# Supplementary material for: Synthesis of Novel Multifunctional bora-Ibuprofen Derivatives
Source: MDPI journal article supplement (doi:10.3390/inorganics11020070), 2023-02-02
Supplement: s1 [file s1]

**Supporting information**  
**for**  
**Synthesis of Novel Multifunctional *bora*-Ibuprofen**  
**Derivatives**

Randika T. Abeysinghe <sup>1</sup>, Alexis C. Ravenscroft <sup>1</sup>, Steven W. Knowlden <sup>1</sup>, Novruz G. Akhmedov <sup>1</sup>, Brian S. Dolinar <sup>1</sup> and Brian V. Popp <sup>1,\*</sup>

1     C. Eugene Bennett Department of Chemistry, West Virginia University, Morgantown,  
West Virginia, 26506, United States.

\*     Correspondence: Brian.Popp@mail.wvu.edu

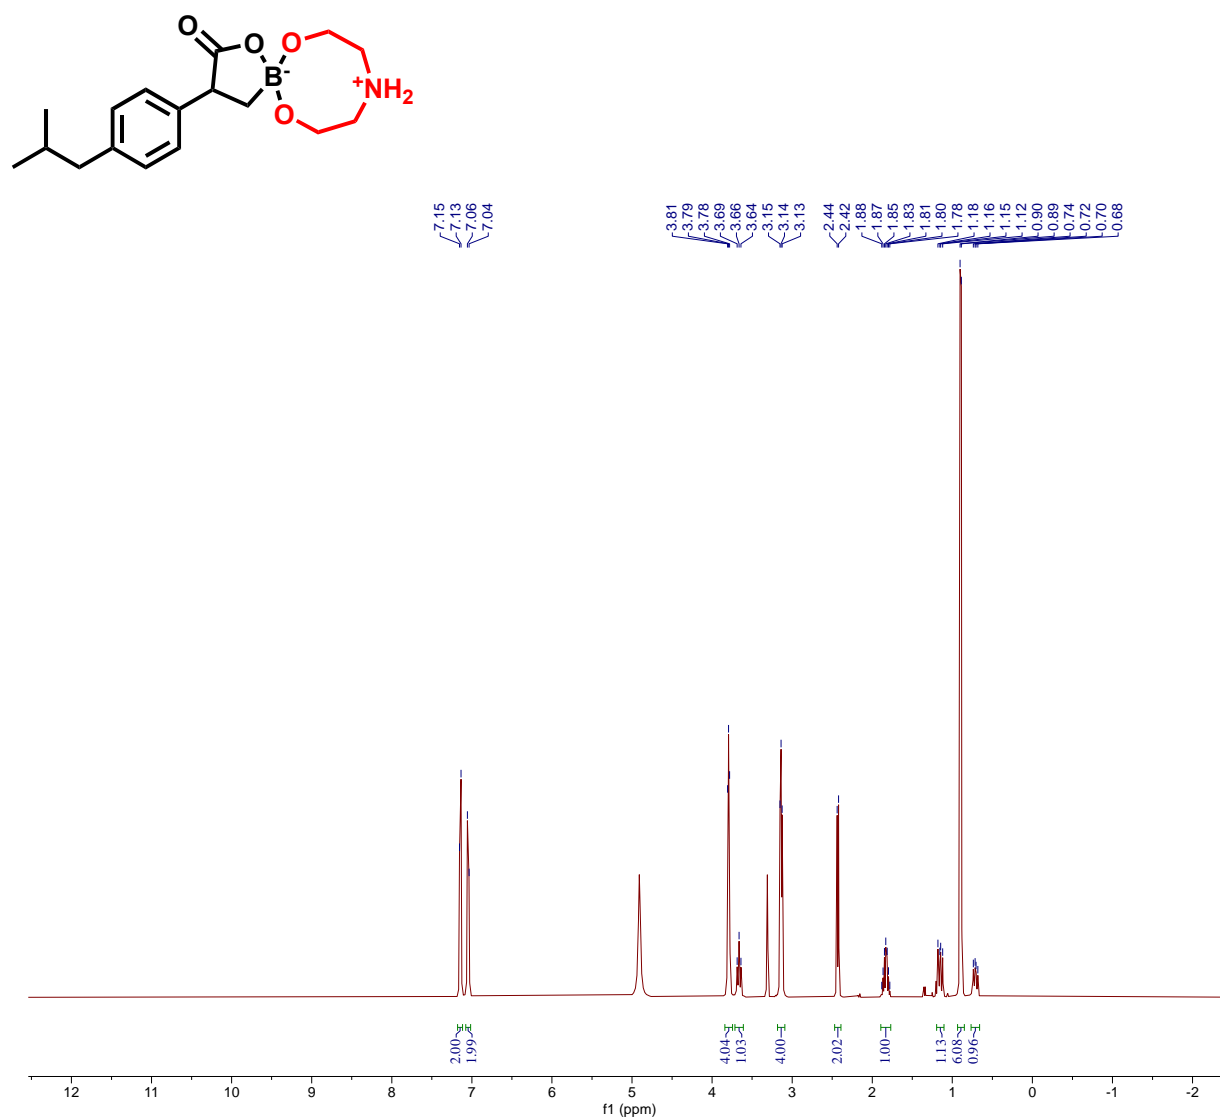

Figure S1.  $^1\text{H}$  NMR Spectrum of **1<sup>DEA</sup>** in CD $_3$ OD.

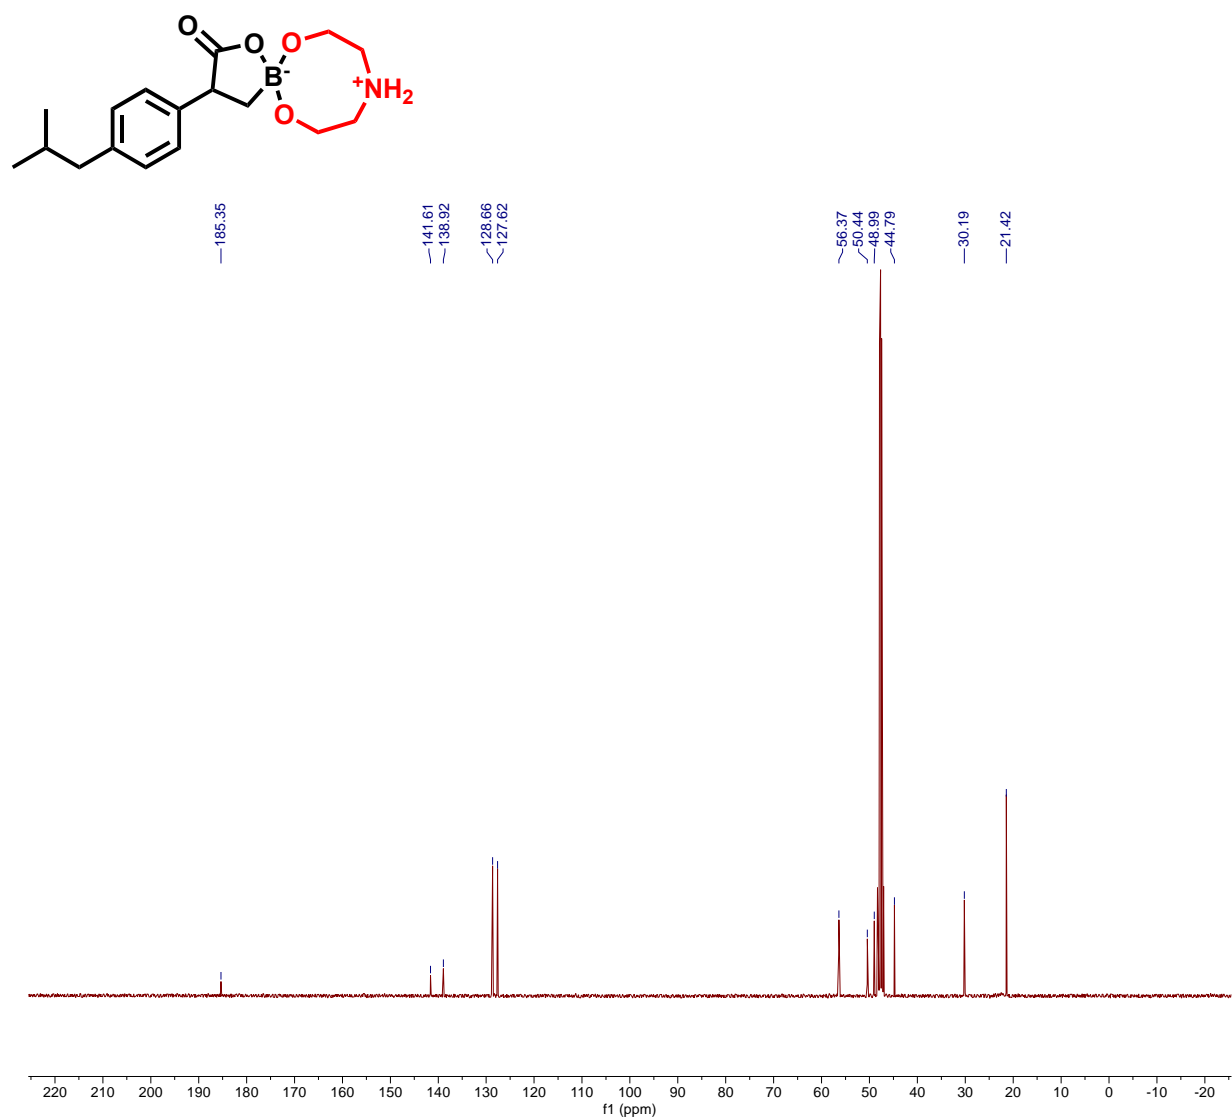

Figure S2. <sup>13</sup>C NMR Spectrum of **1<sup>DEA</sup>** in CD<sub>3</sub>OD.

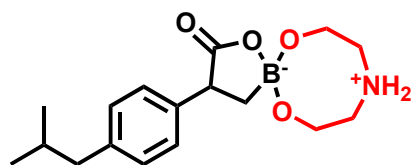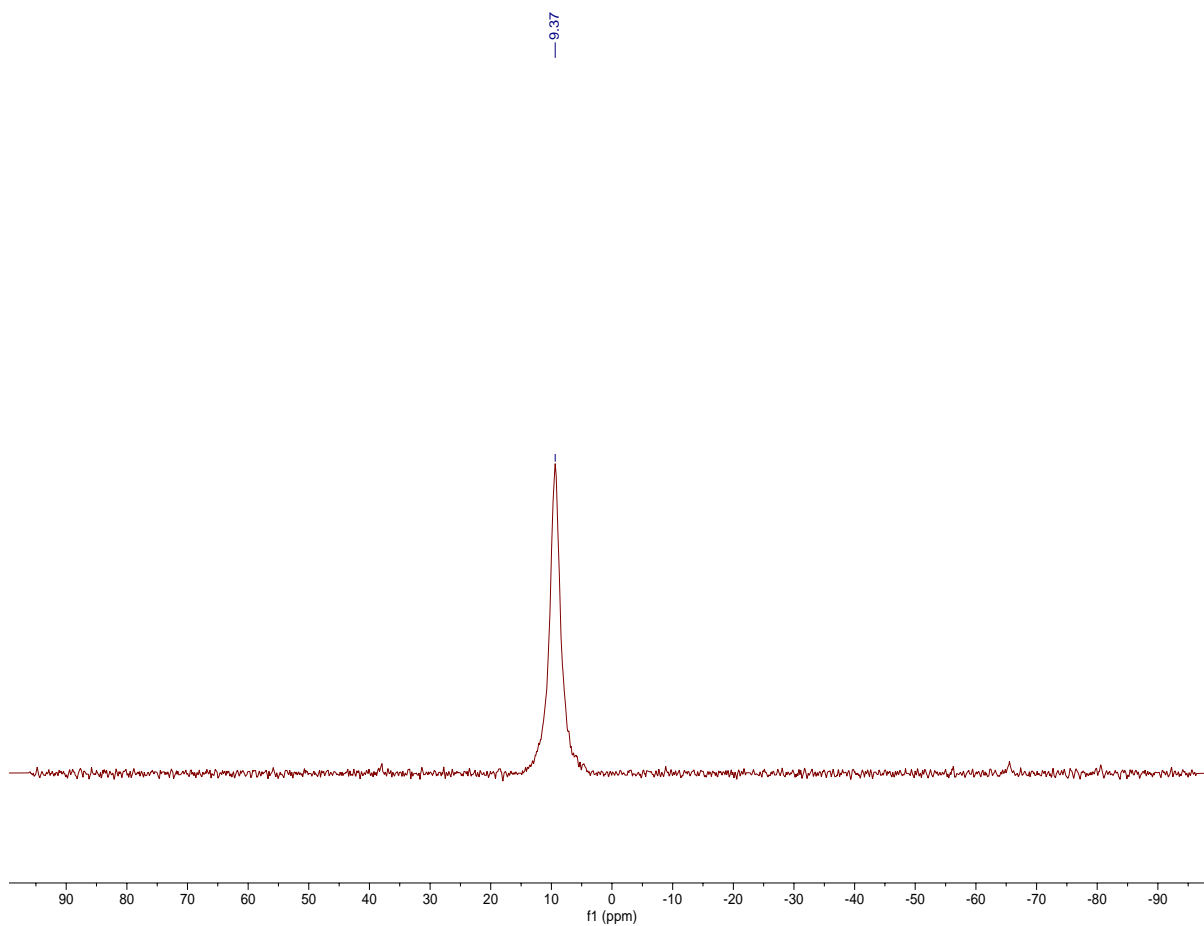

Figure S3.  $^{11}\text{B}$  NMR Spectrum of **1**<sup>DEA</sup> in  $\text{CD}_3\text{OD}$ .

## ABX spin system

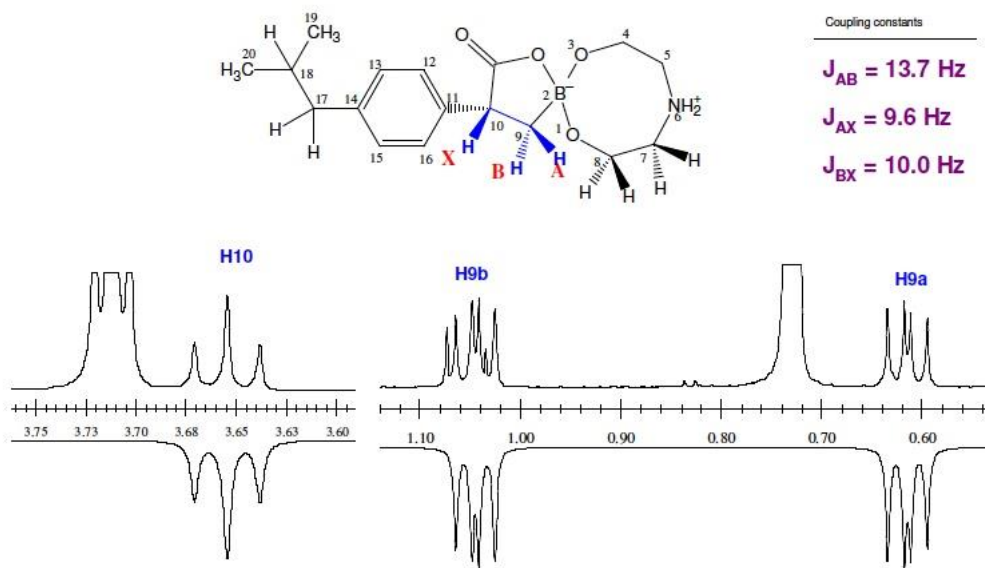

## AA part of the AA'XX' spin system

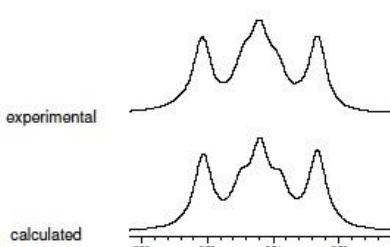

Coupling constants

- $J_{AA'} = -13.96 \text{ Hz}$
- $J_{XX'} = -13.71 \text{ Hz}$
- $J_{AX} = 3.44 \text{ Hz}$
- $J_{AX'} = 6.99 \text{ Hz}$

## XX part of the AA'XX' spin system

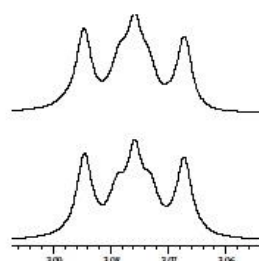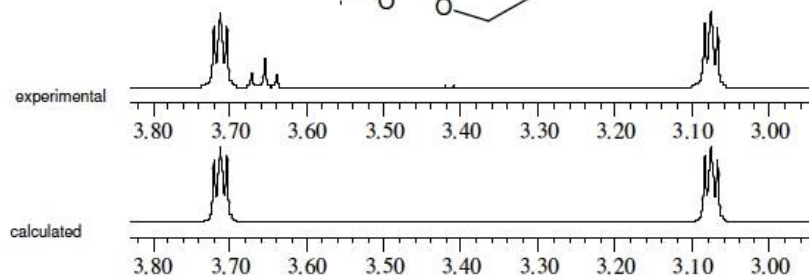

## A6BX2 spin system

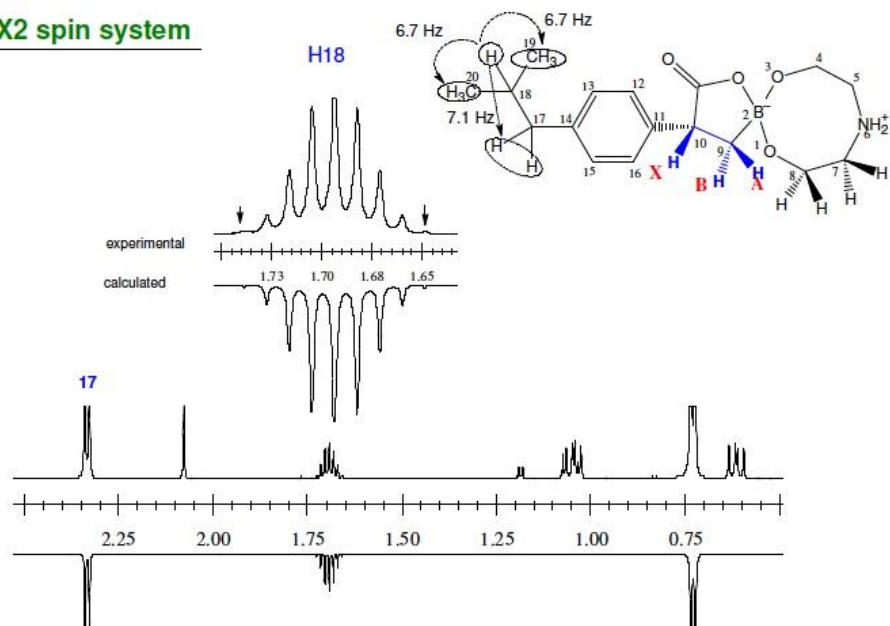

## AA'BB' spin system

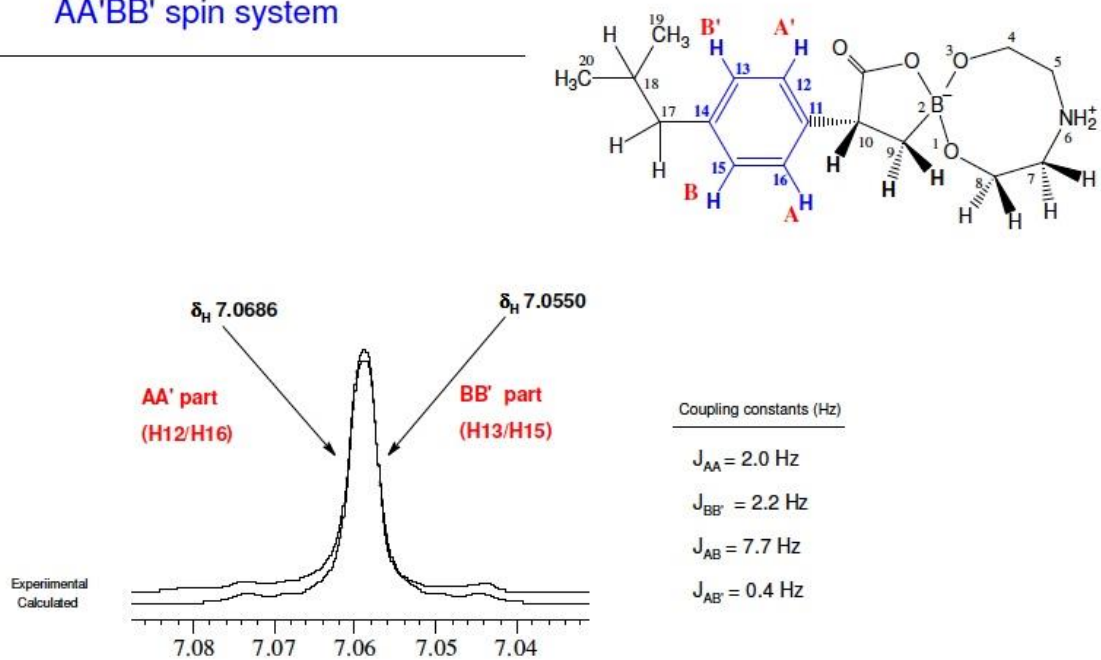

$^1\text{H}$  NMR spectrum in  $\text{D}_2\text{O}$

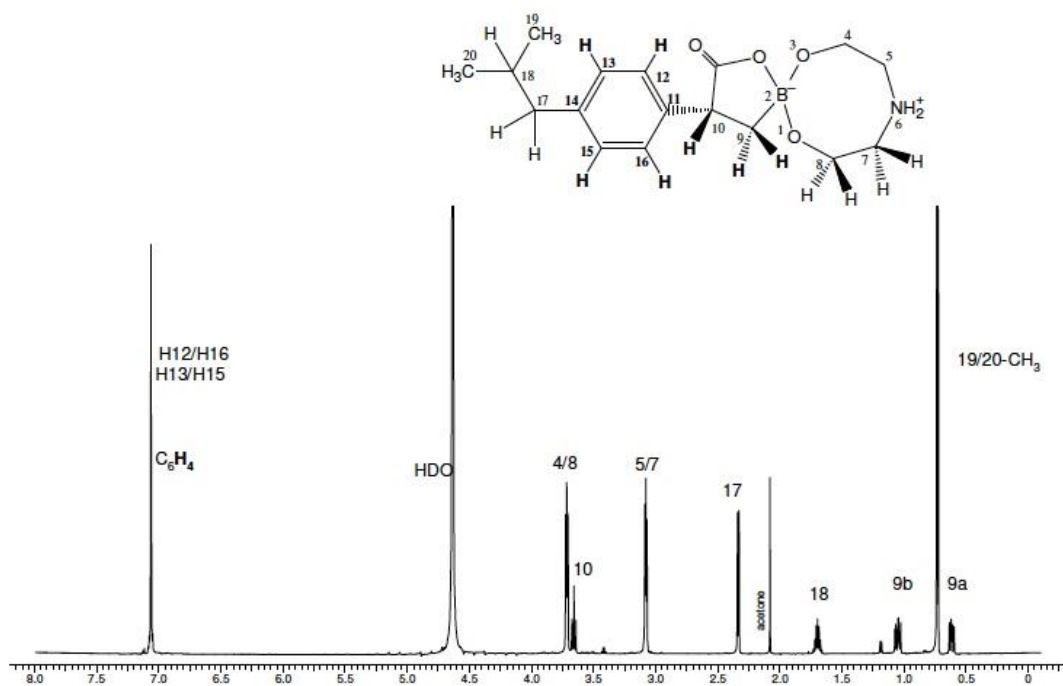

# Multiplicity edited gHSQCAD spectrum

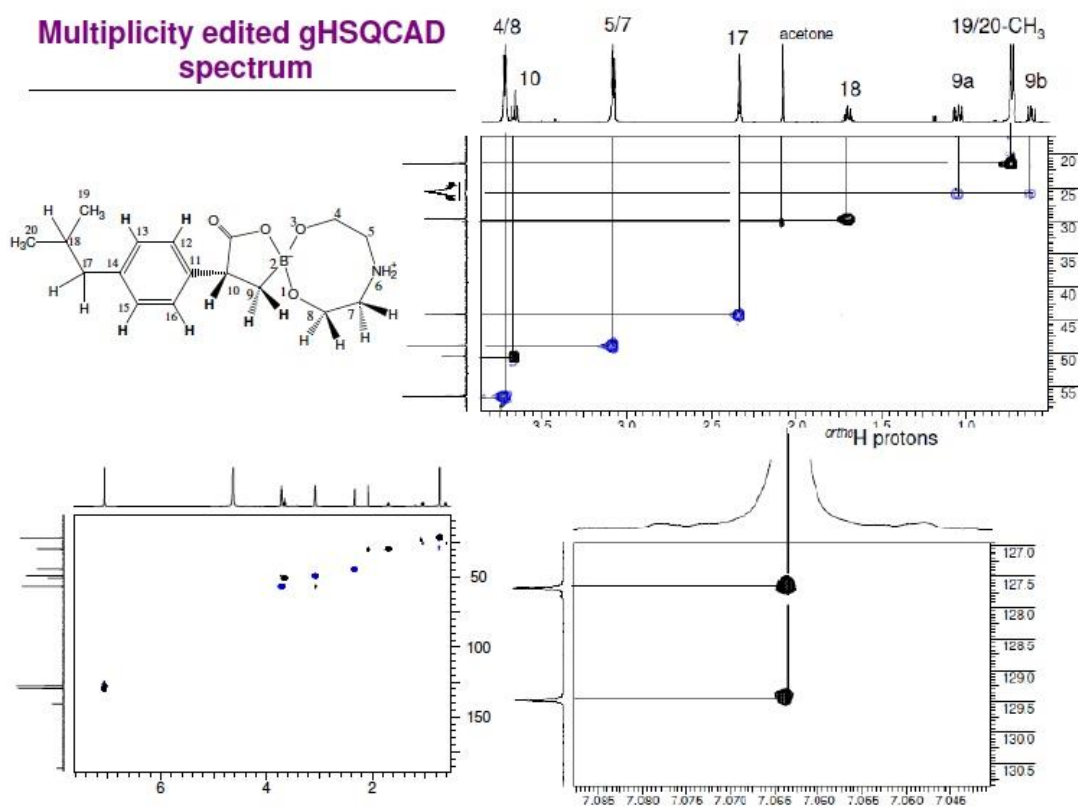



Long-range  
HMBC correlations  
(expanded regions)

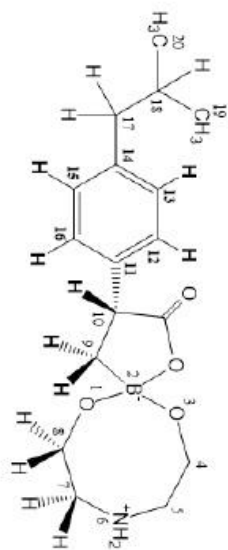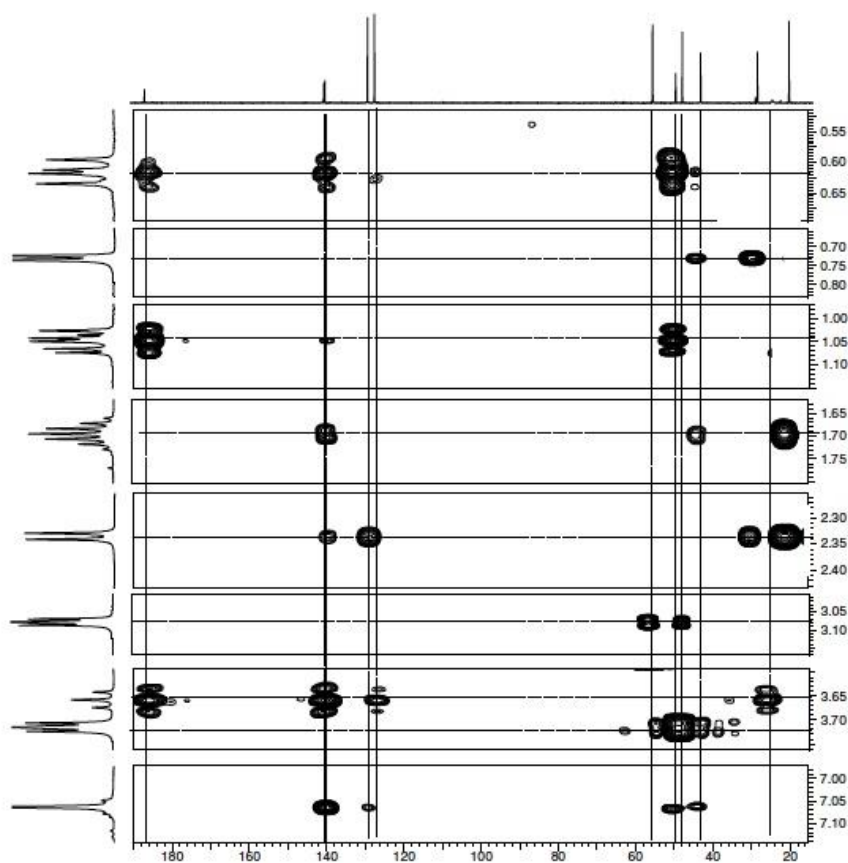

# Relative stereochemistry

*H10 and H9a shares a syn relationship*

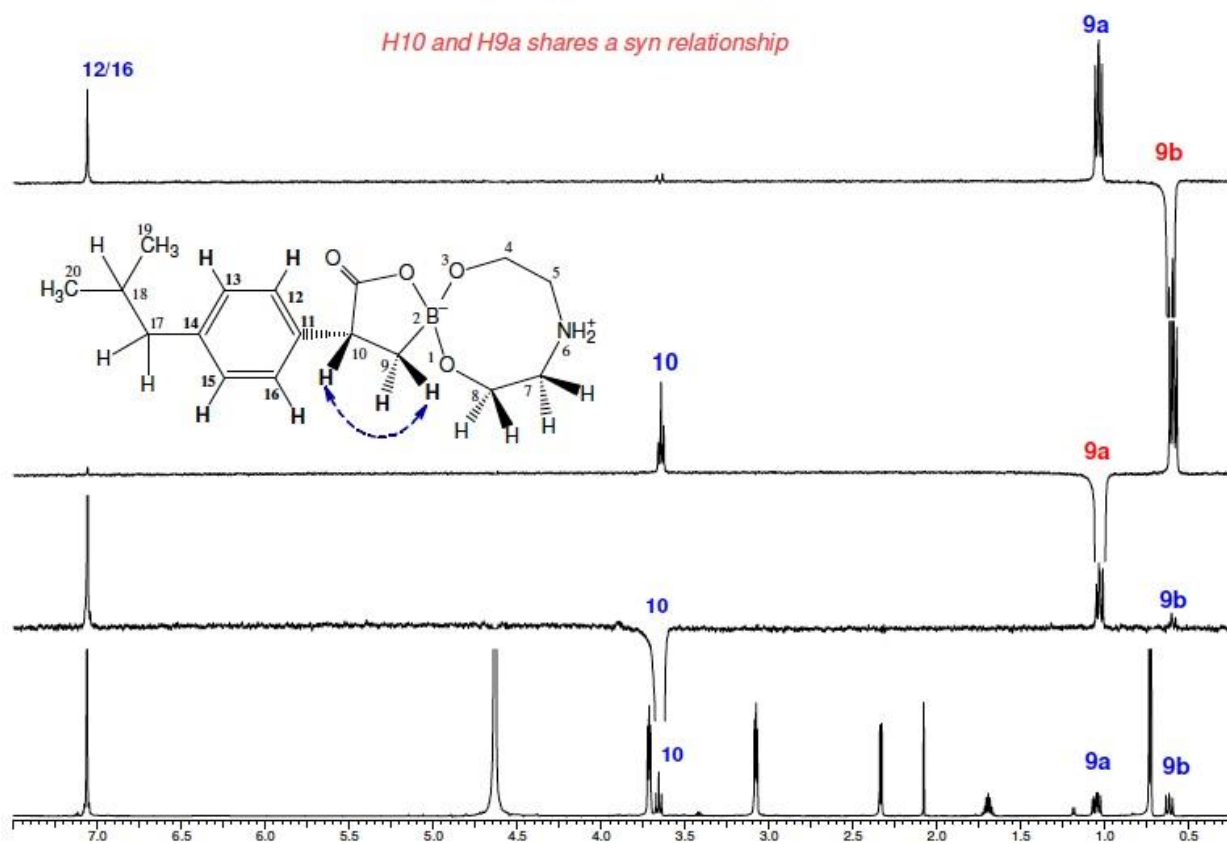

# DPFGSENOE subspectrum

*H9b in space is close to the ortho protons of the Phenyl group*

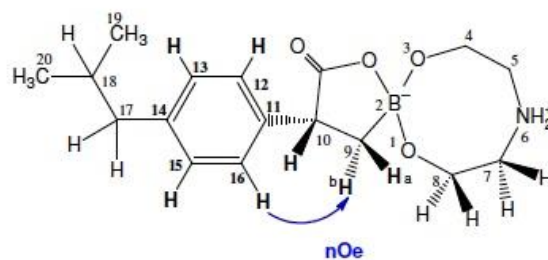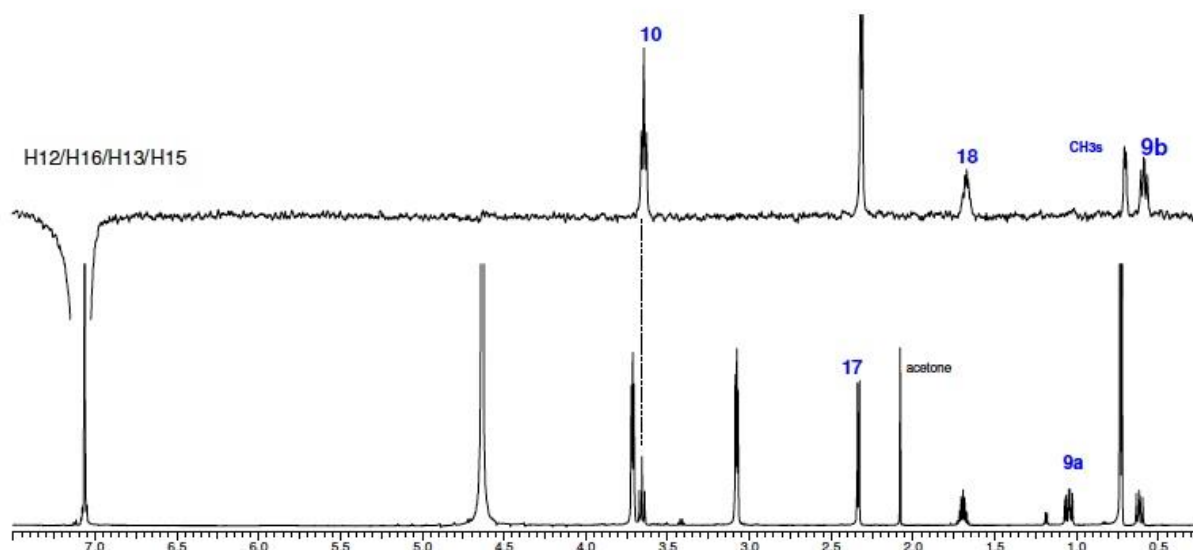

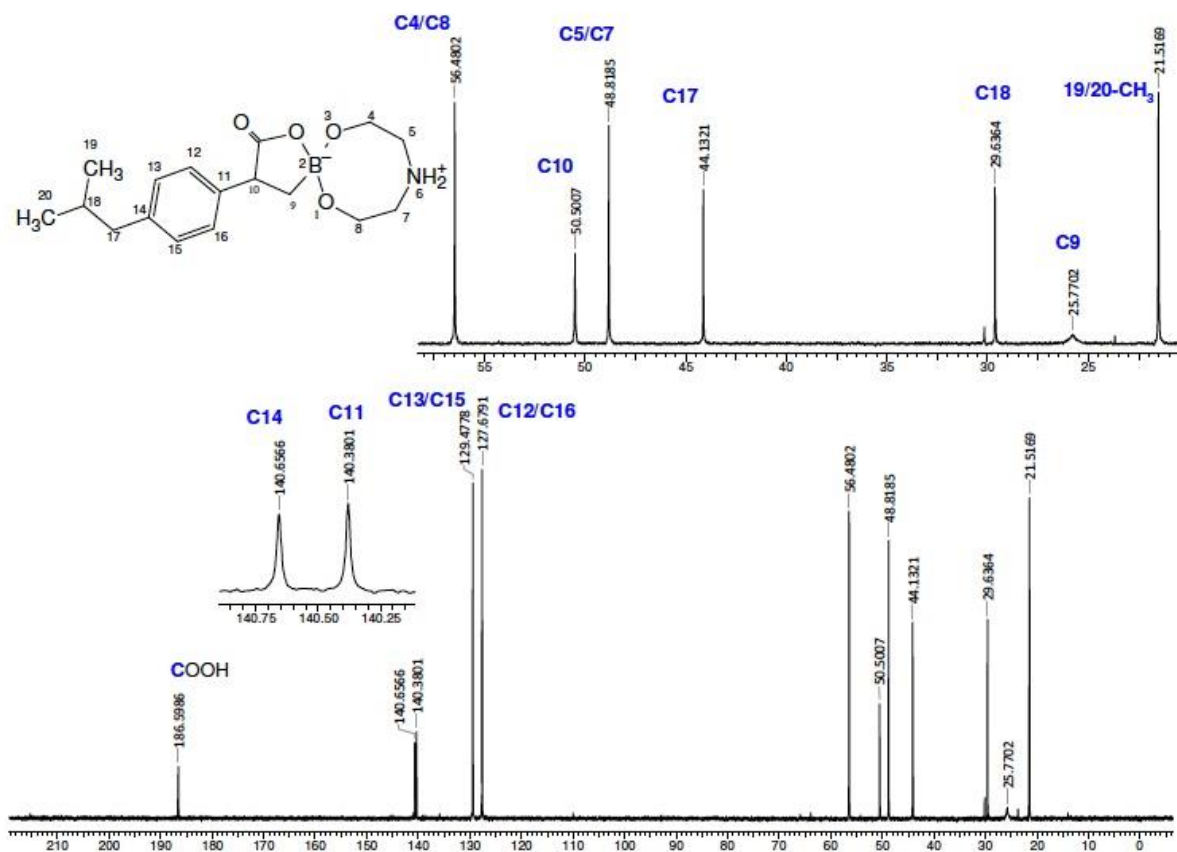

Figure S4. Full NMR characterization of **1<sup>DEA</sup>** in CD<sub>3</sub>OD.

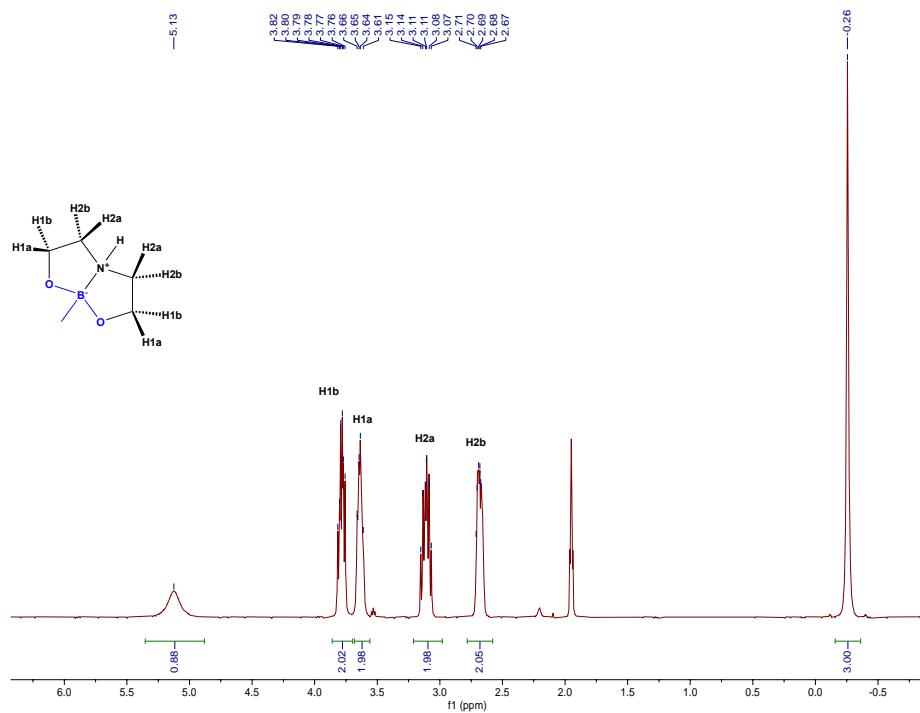

Figure S5. <sup>1</sup>H NMR spectrum of DABO methyl boronate in CD<sub>3</sub>CN.

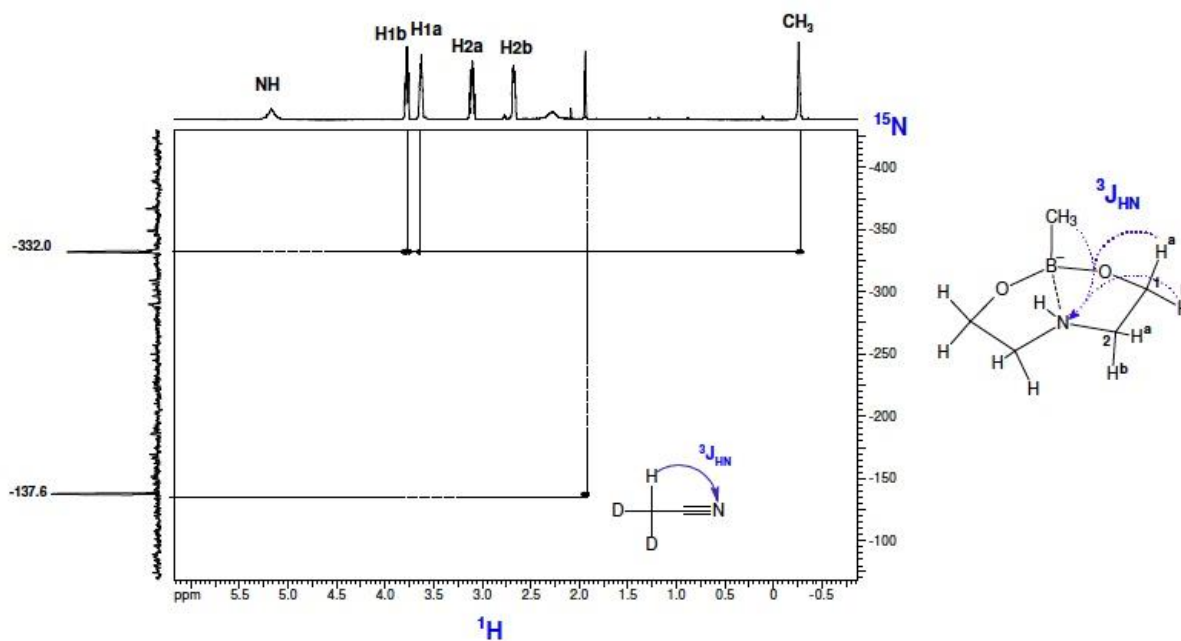

Figure S6. Two-dimensional <sup>1</sup>H-<sup>15</sup>N CIGAR-HMBC NMR spectrum of DABO methyl boronate in CD<sub>3</sub>CN. The <sup>11</sup>B NMR chemical shift was observed at δ 11.2 ppm in CD<sub>3</sub>CN.

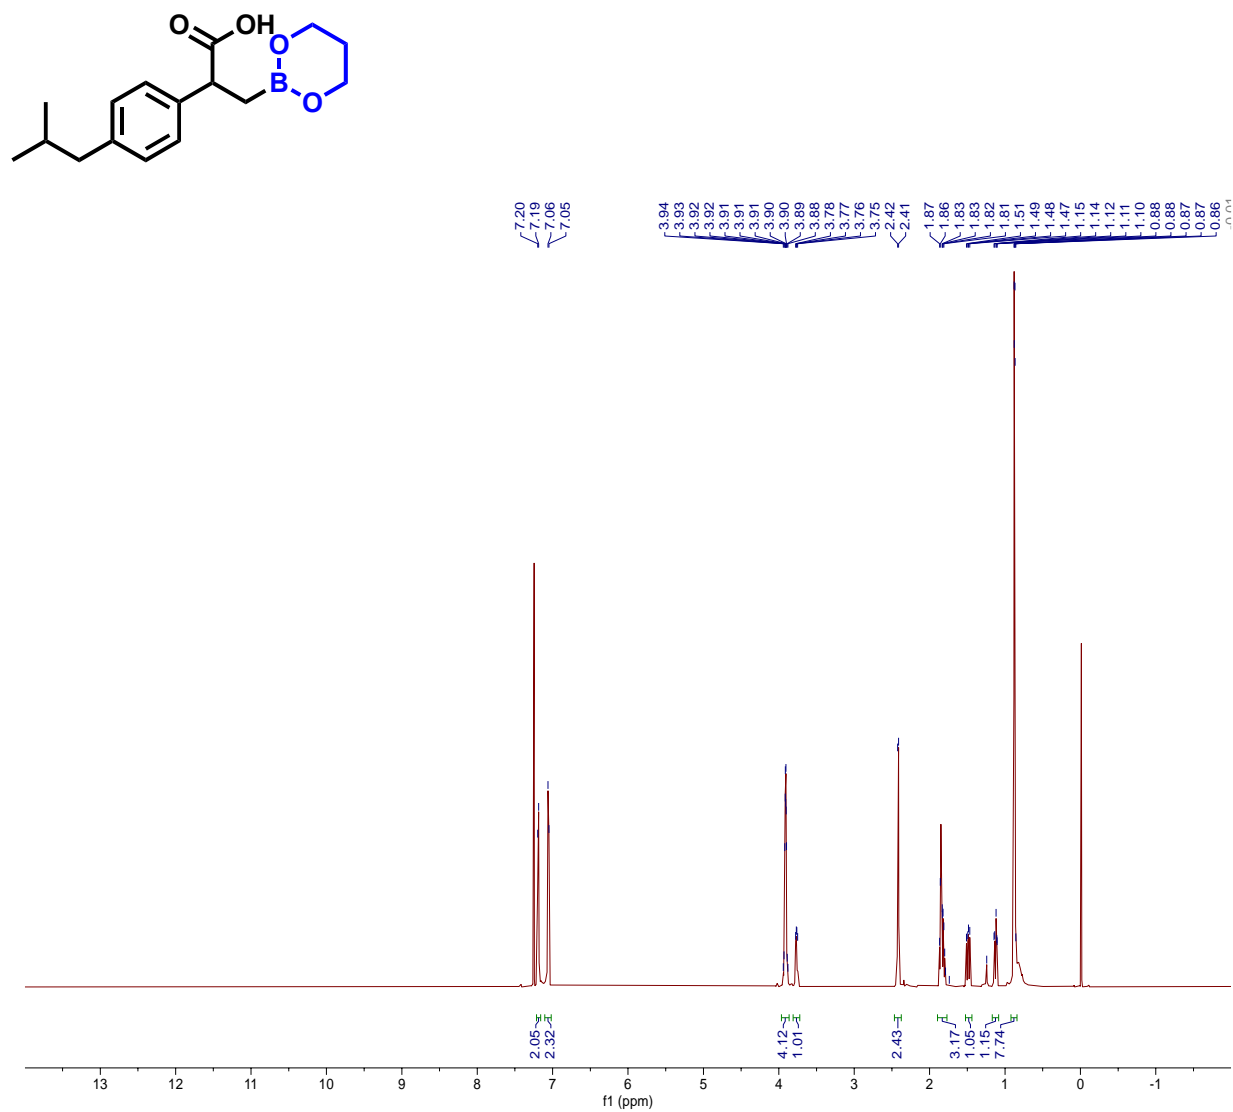

Figure S7. <sup>1</sup>H NMR Spectrum of **1a** in CDCl<sub>3</sub>.

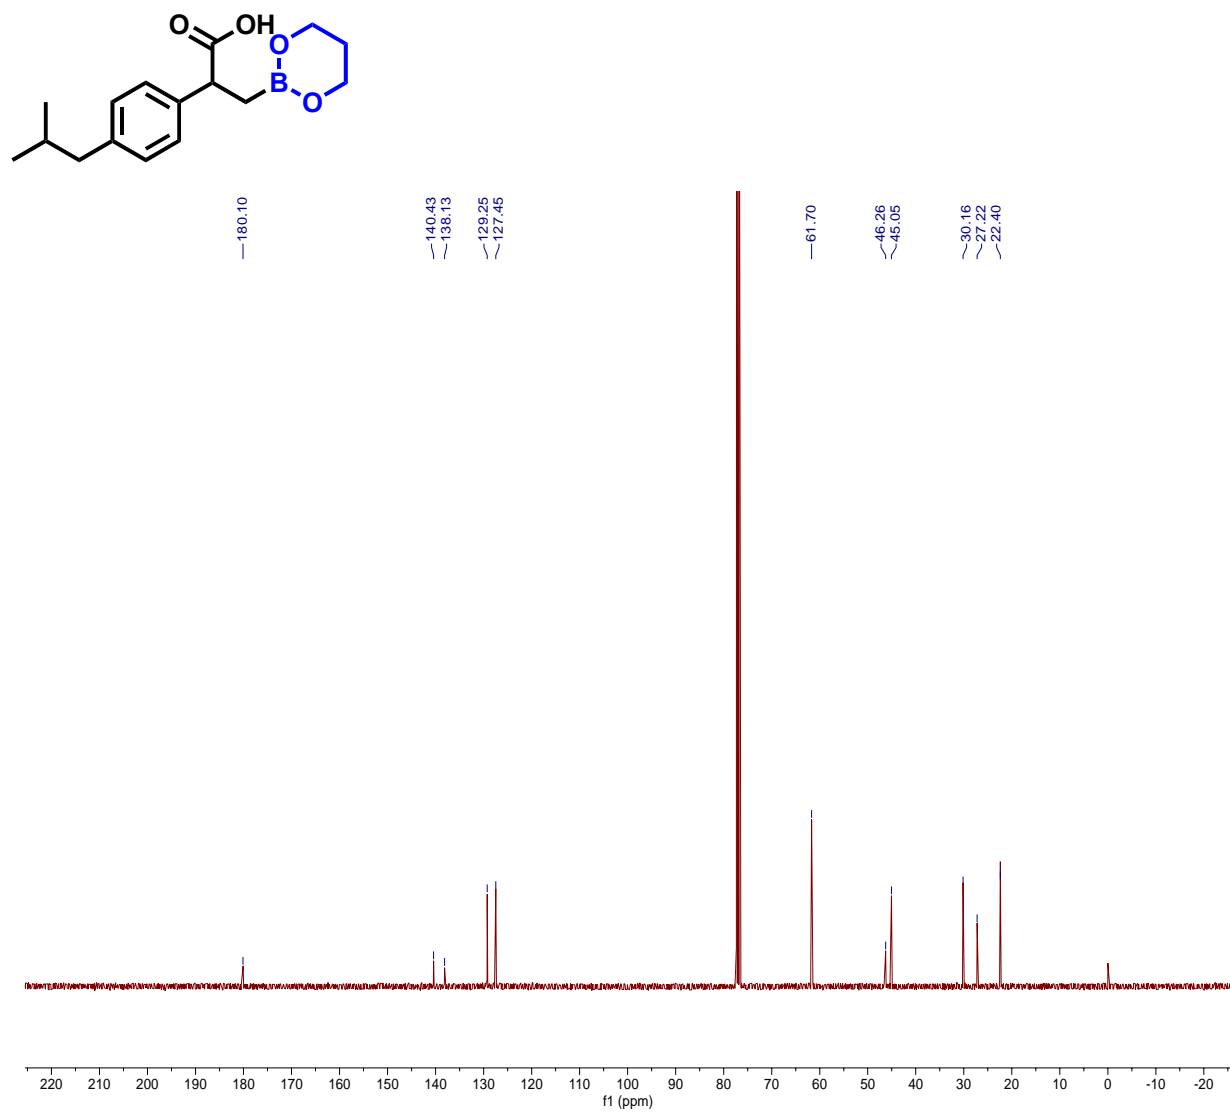

Figure S8. <sup>13</sup>C NMR Spectrum of **1a** in CDCl<sub>3</sub>.

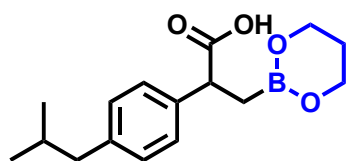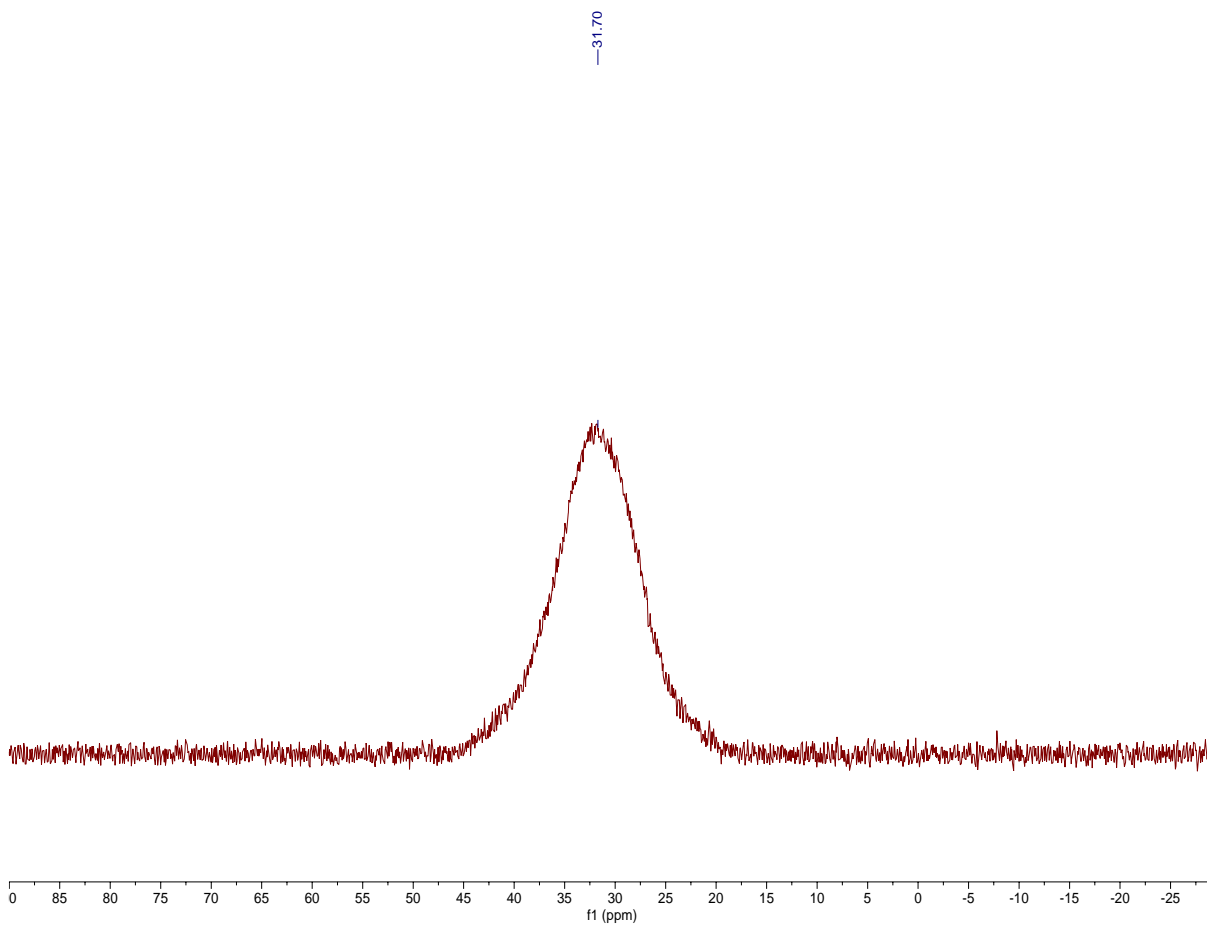

Figure S9.  $^{11}\text{B}$  NMR Spectrum of **1a** in  $\text{CDCl}_3$ .



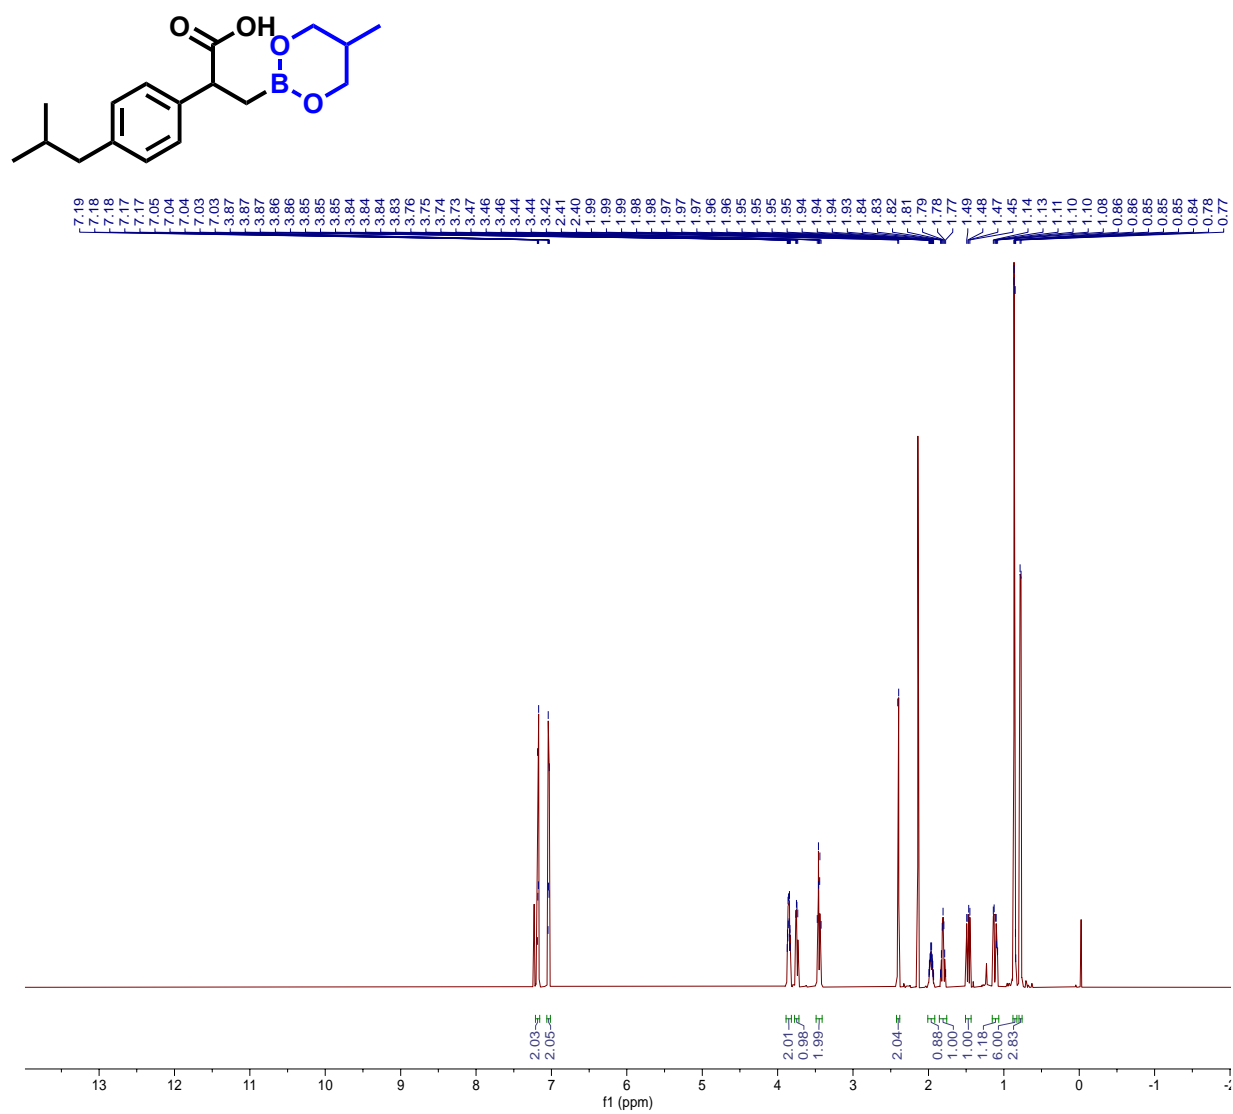

Figure S10. <sup>1</sup>H NMR Spectrum of **1b** in CDCl<sub>3</sub>.

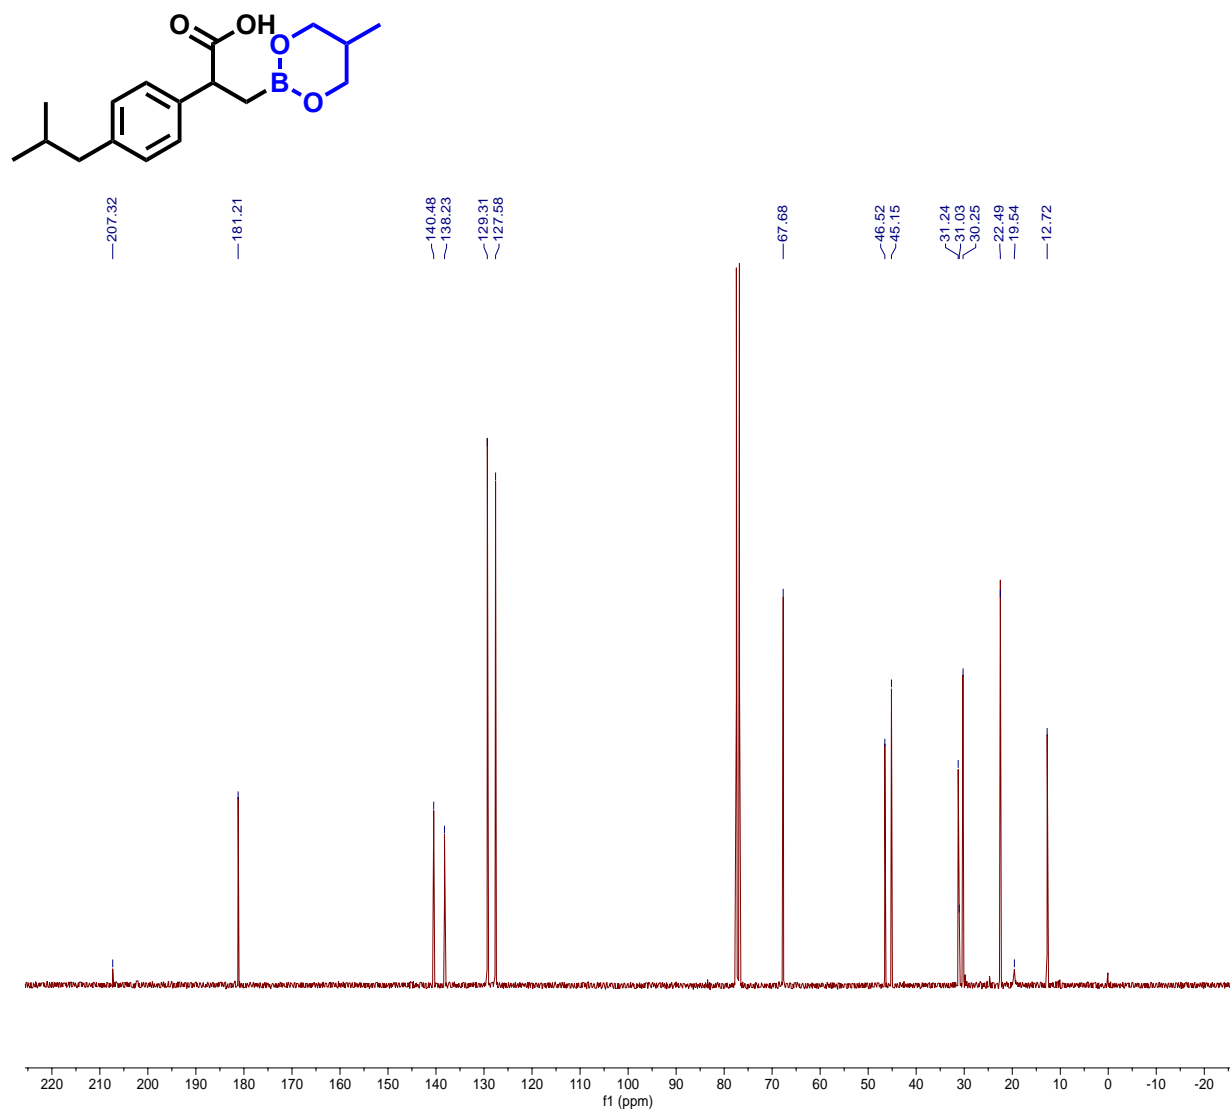

Figure S11.  $^{13}\text{C}$  NMR Spectrum of **1b** in CDCl<sub>3</sub>.

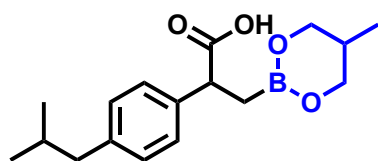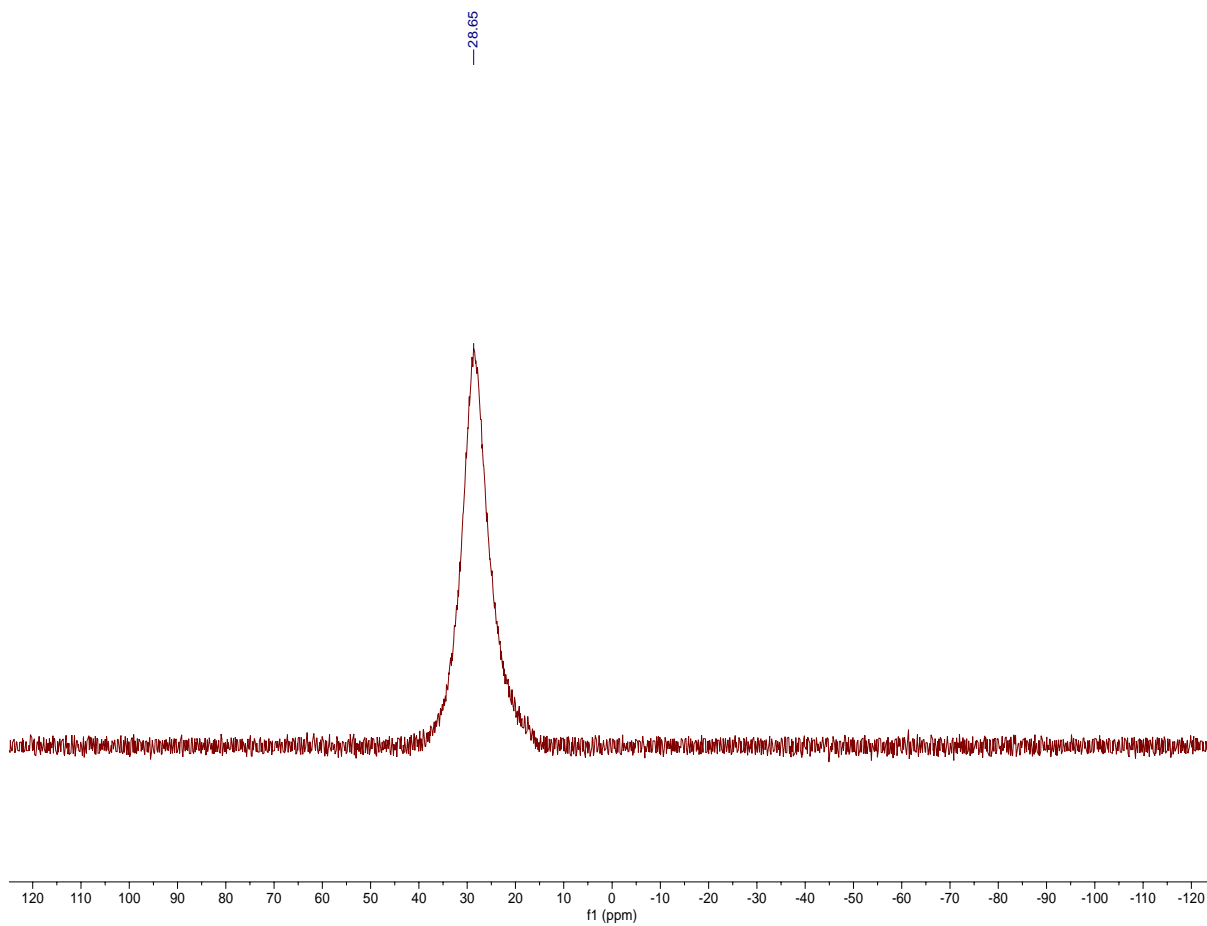

Figure S12.  $^{11}\text{B}$  NMR Spectrum of **1b** in  $\text{CDCl}_3$ .

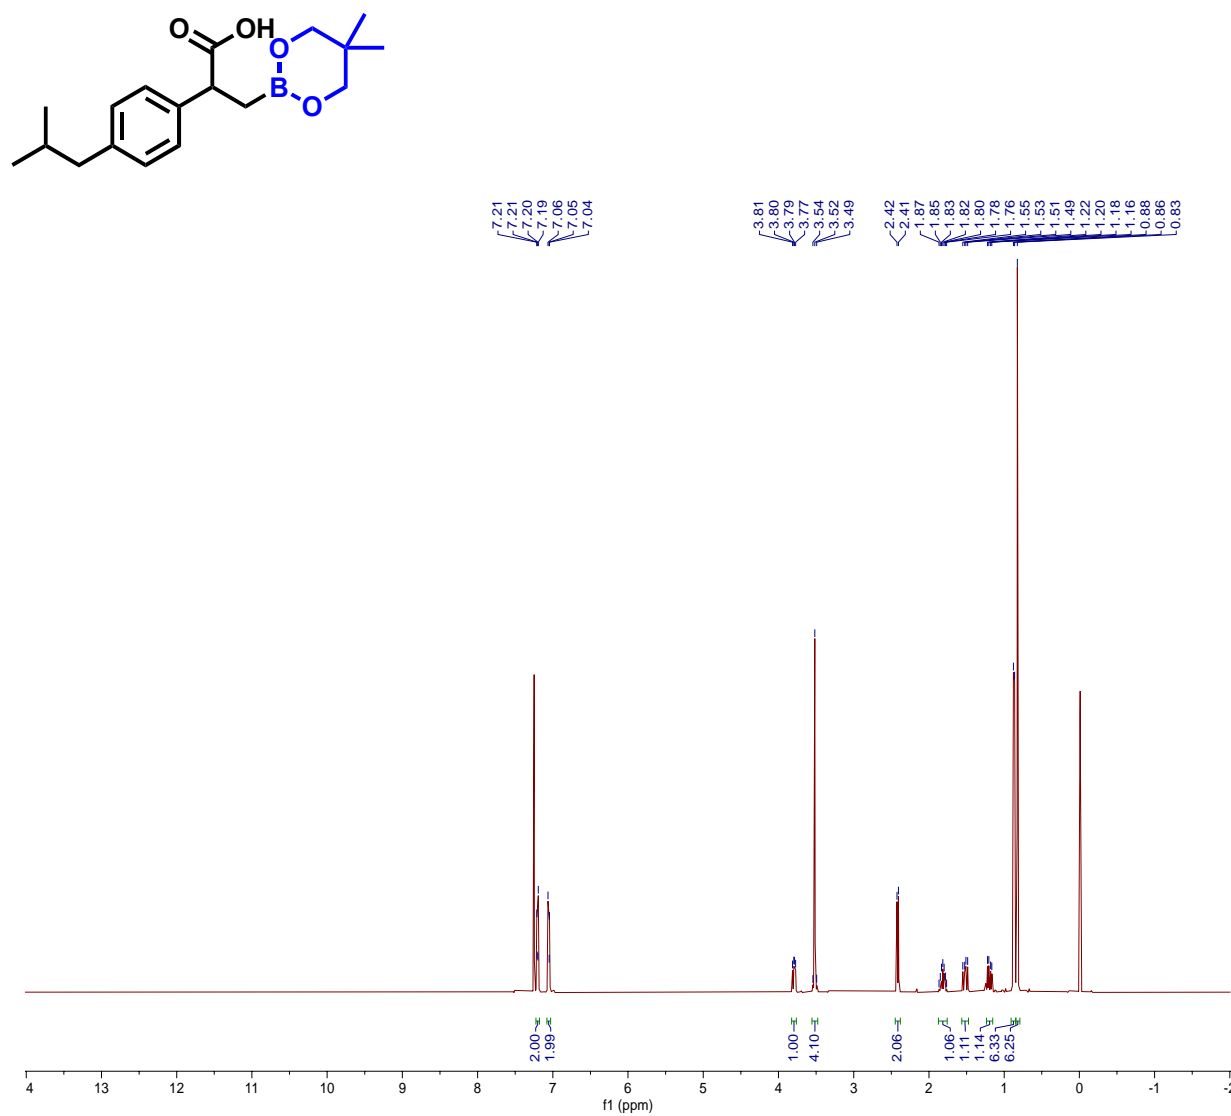

Figure S13. <sup>1</sup>H NMR Spectrum of **1c** in CDCl<sub>3</sub>.

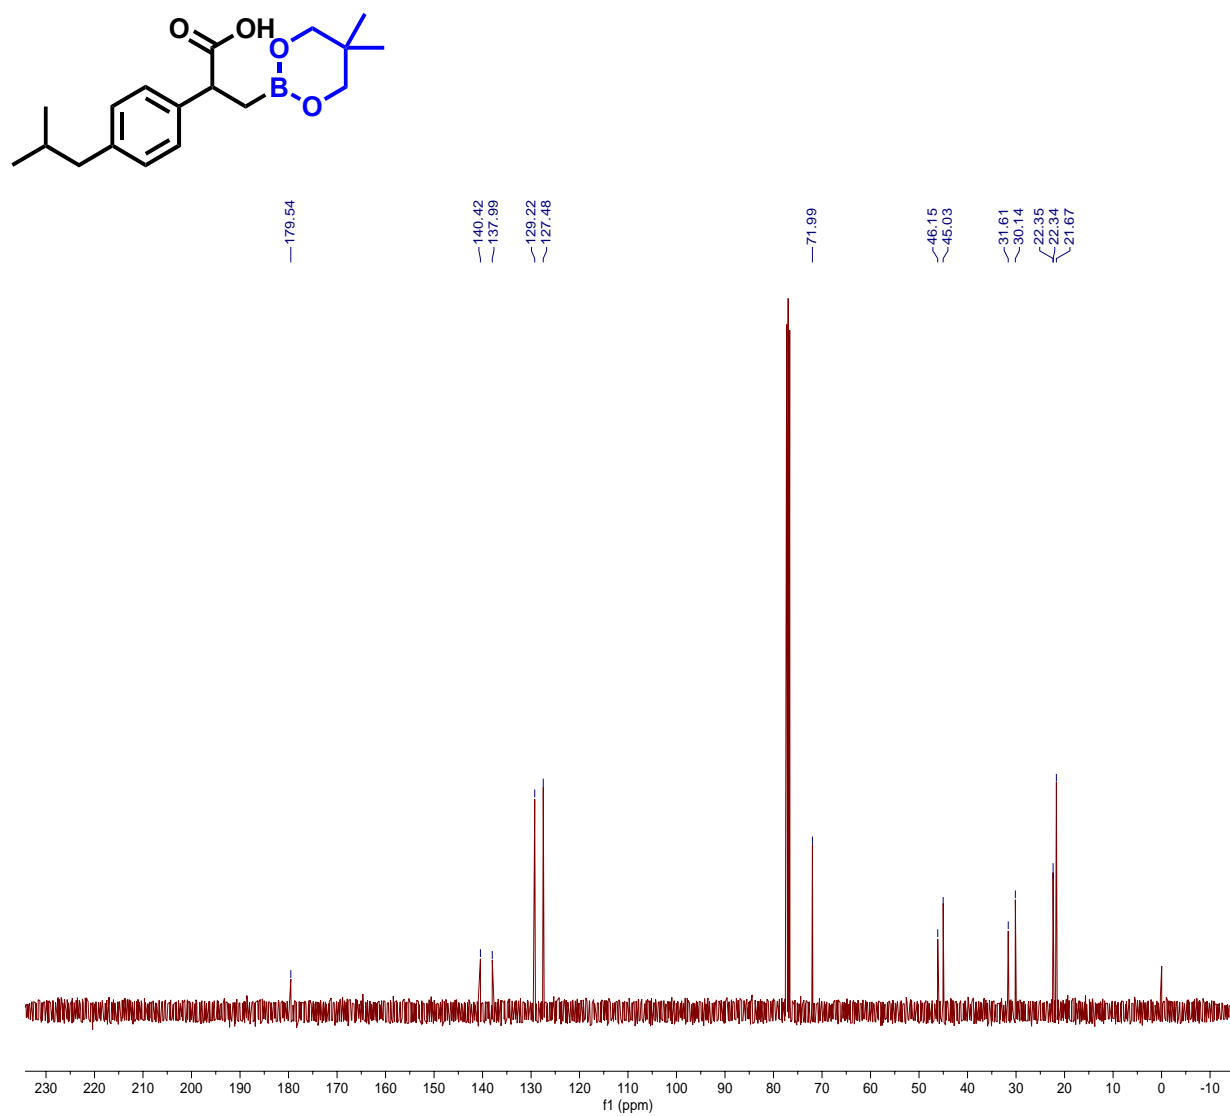

Figure S14.  $^{13}\text{C}$  NMR Spectrum of **1c** in  $\text{CDCl}_3$ .

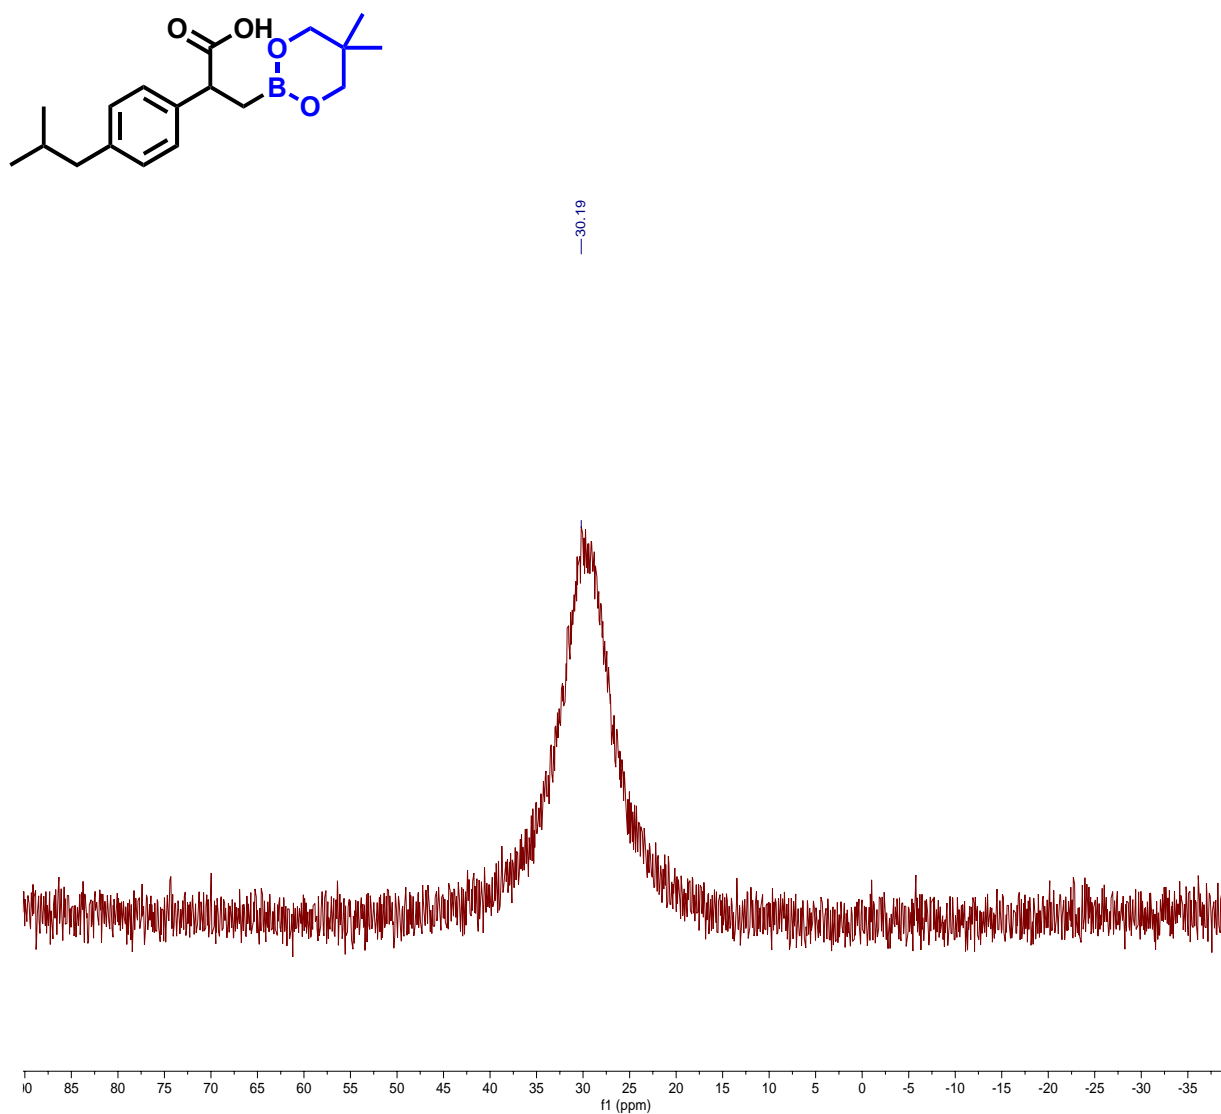

Figure S15.  $^{11}\text{B}$  NMR Spectrum of **1c** in  $\text{CDCl}_3$ .

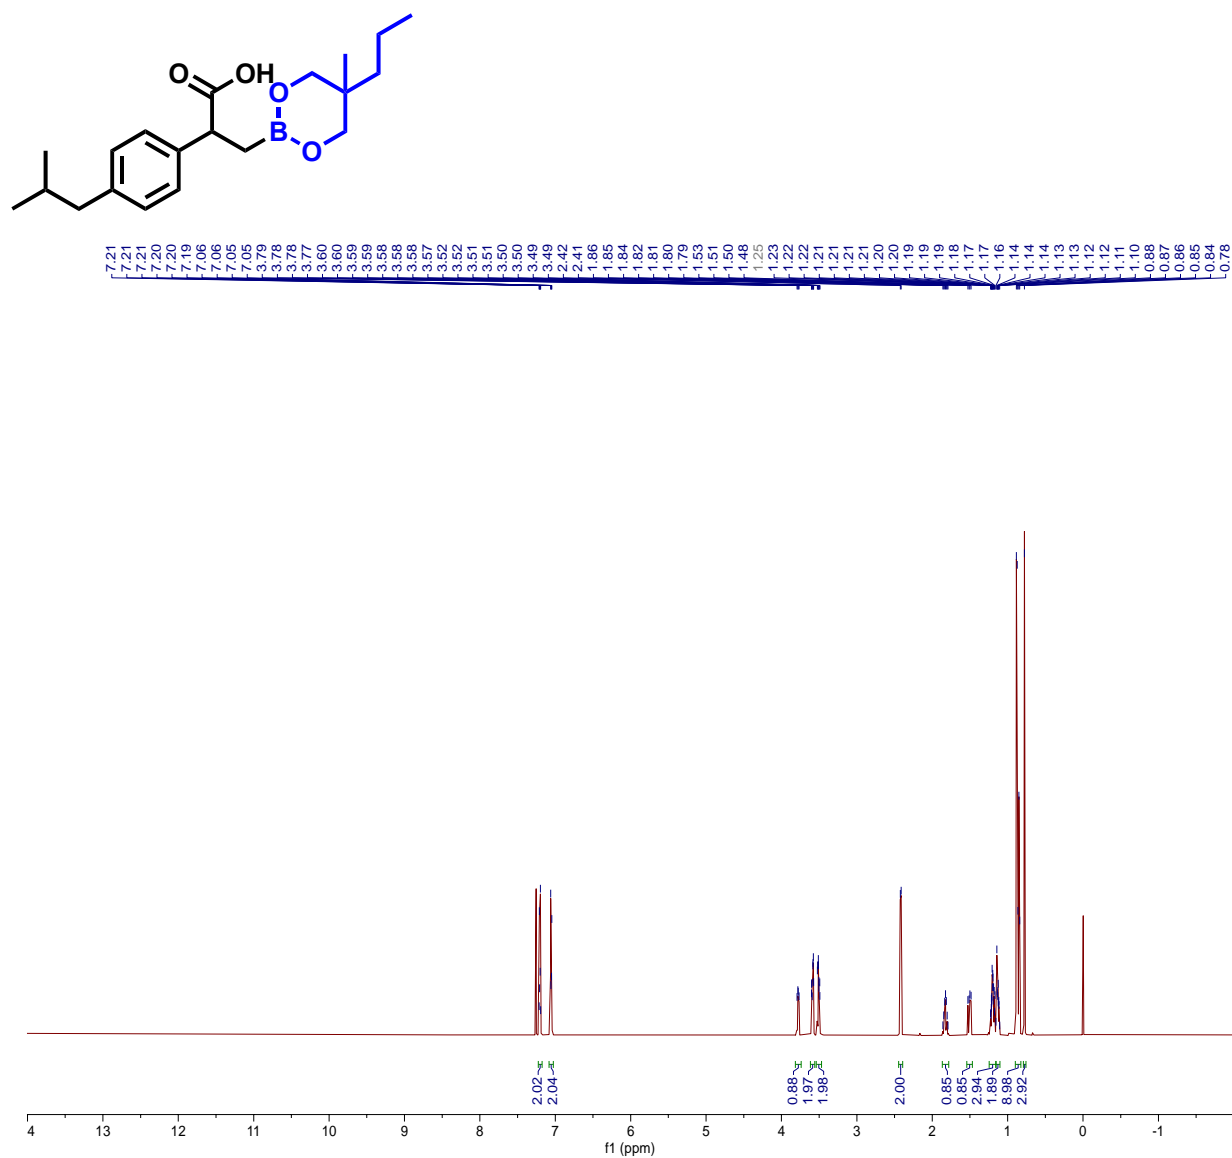

Figure S16. <sup>1</sup>H NMR Spectrum of **1d** in CDCl<sub>3</sub>.

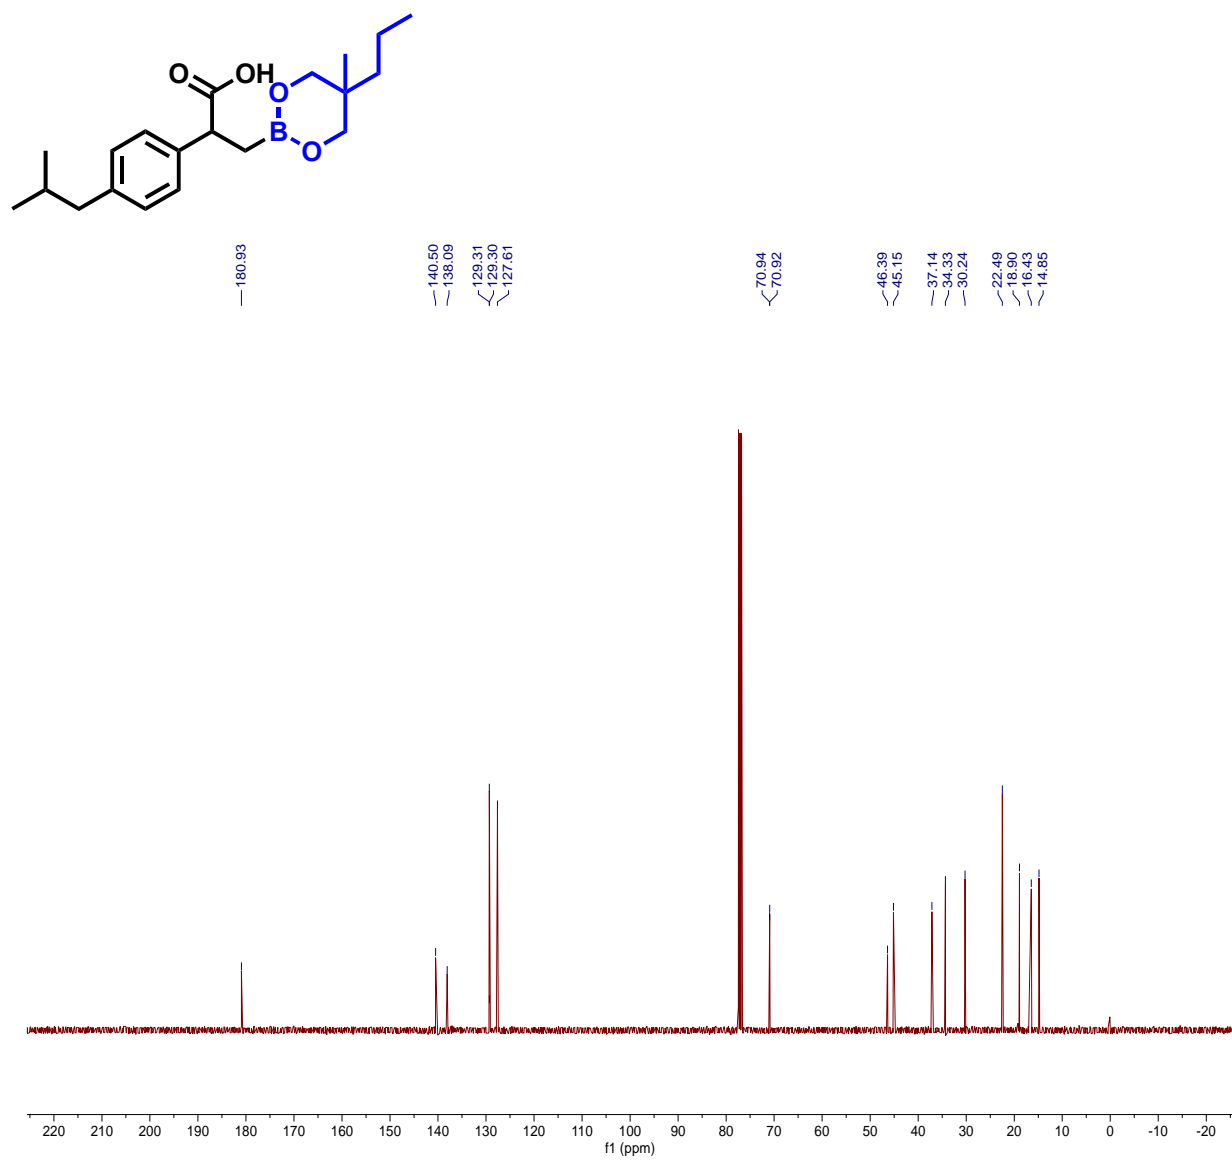

Figure S17. <sup>13</sup>C NMR Spectrum of **1d** in CDCl<sub>3</sub>.



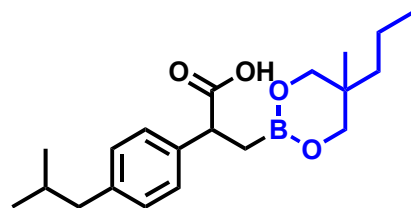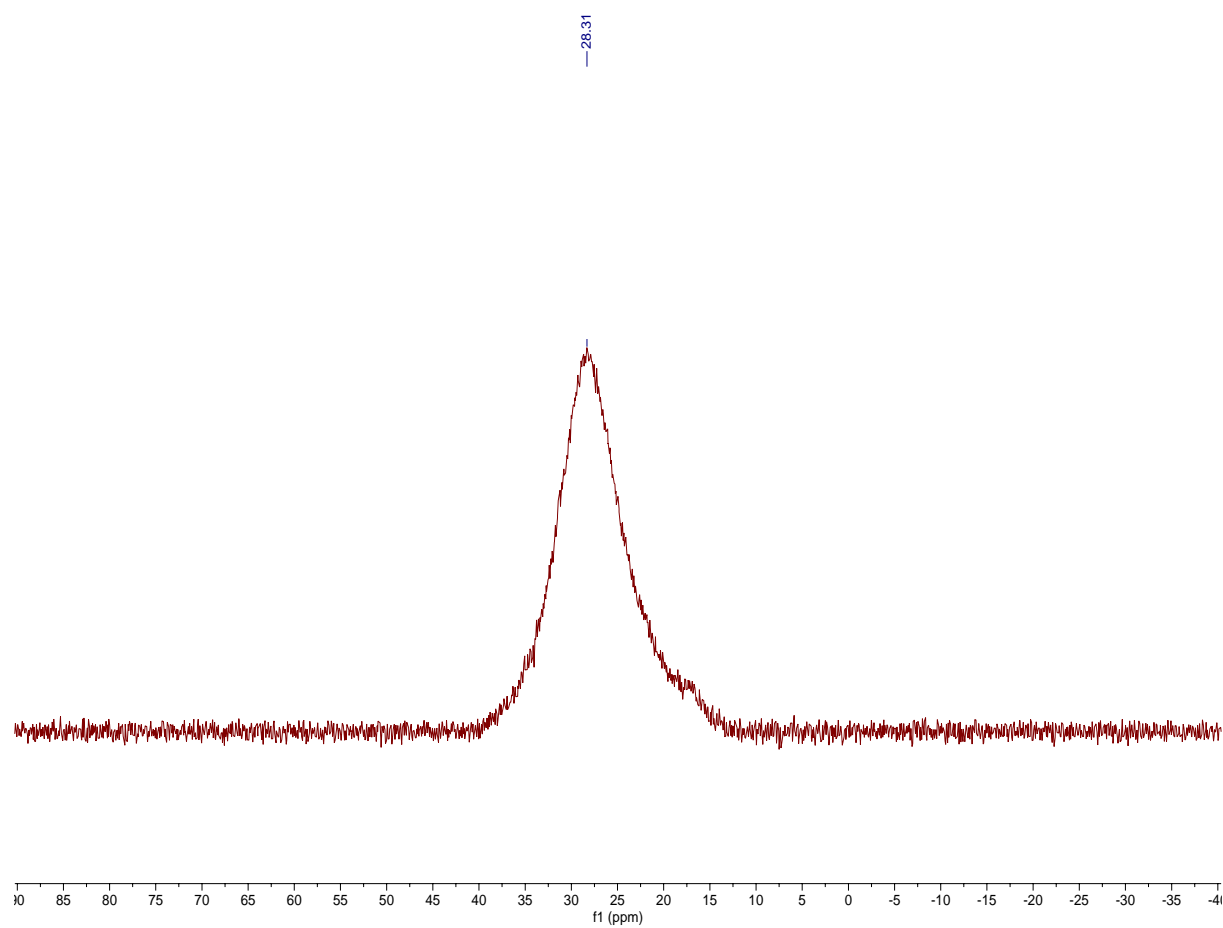

Figure S18.  $^{11}\text{B}$  NMR Spectrum of **1d** in  $\text{CDCl}_3$ .

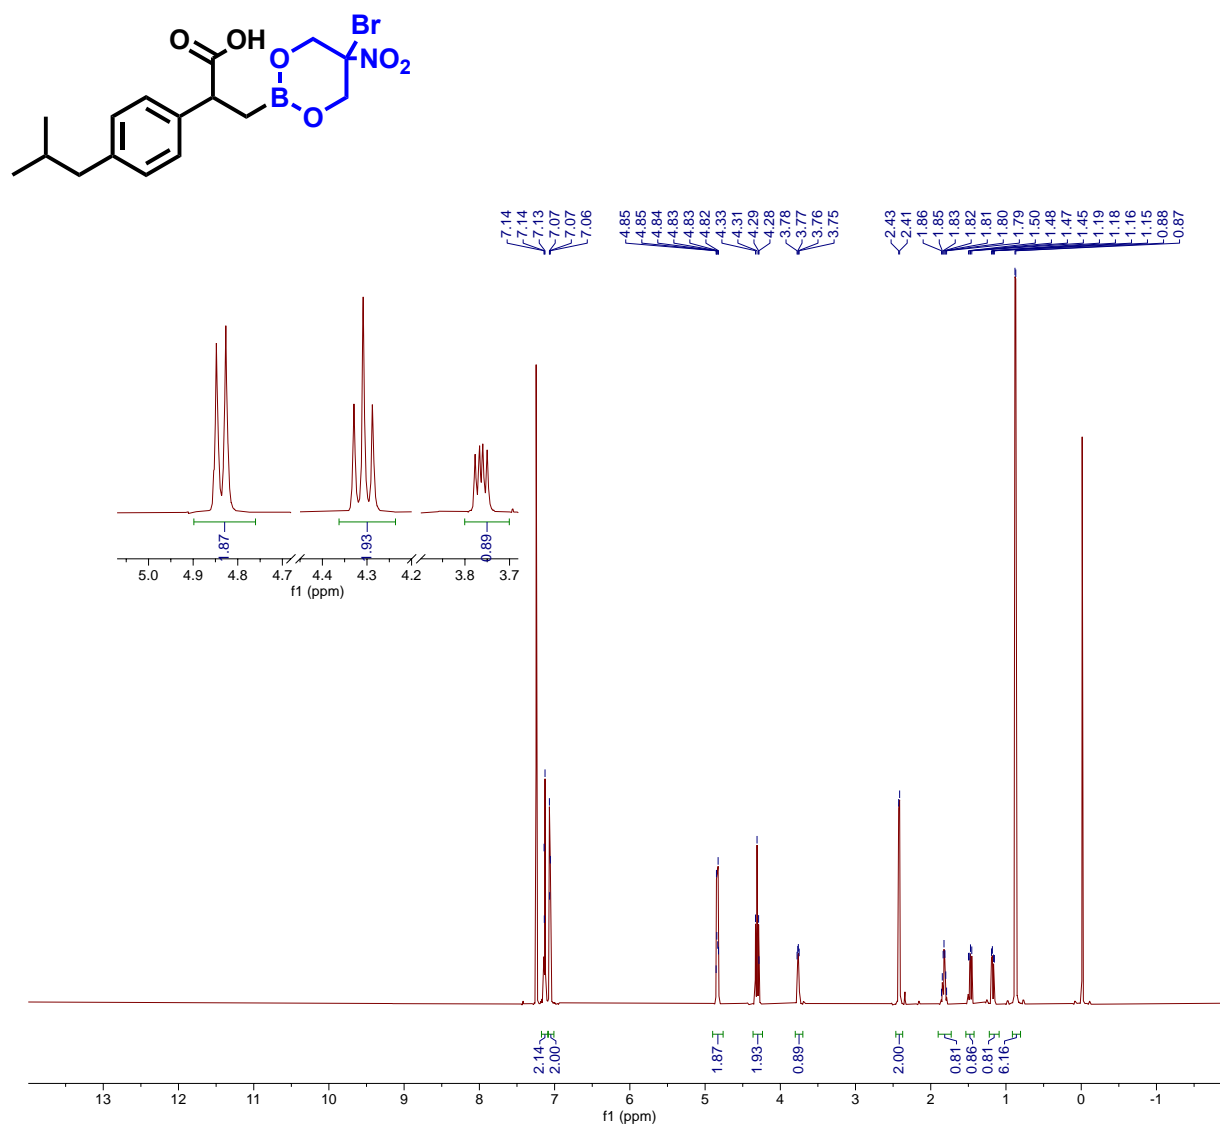

Figure S19. <sup>1</sup>H NMR Spectrum of **1c** in CDCl<sub>3</sub>.

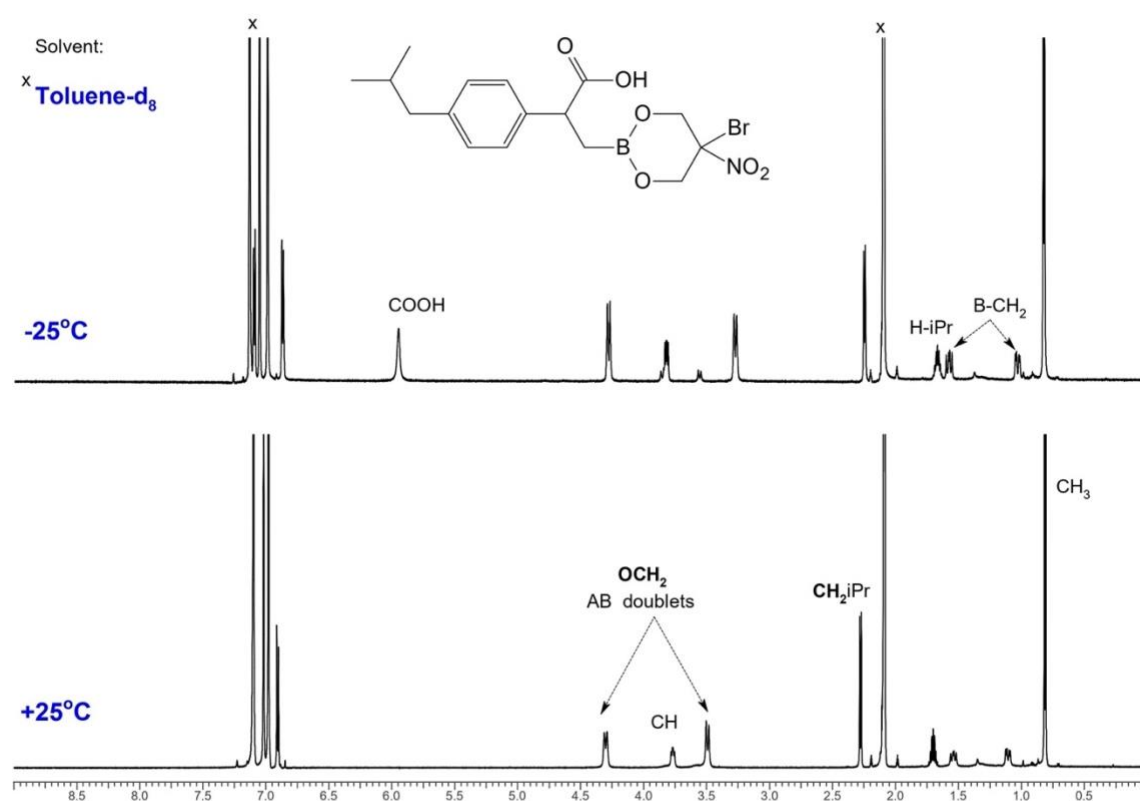

Figure S20. VT- $^1\text{H}$  NMR Spectrum of **1c** in Toluene- $d_8$ .

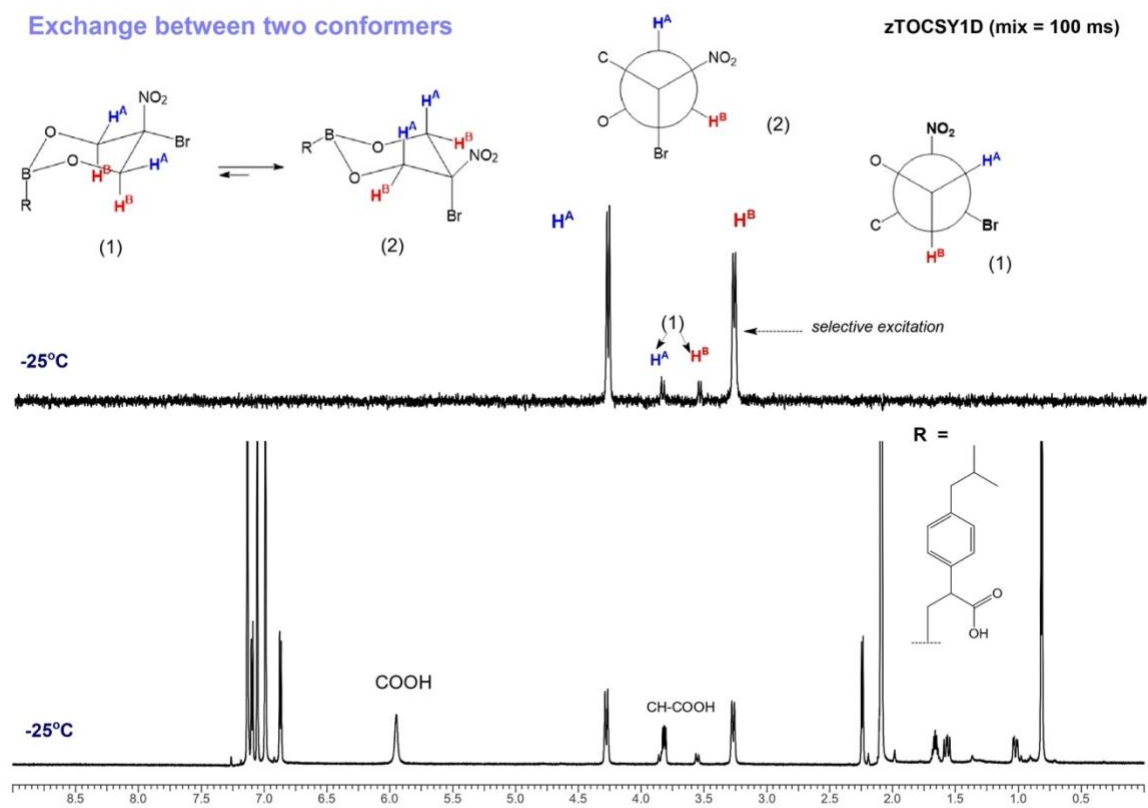

Figure S21. zTOCSY 1D  $^1\text{H}$  NMR Spectrum of **1c** in toluene- $\text{d}_8$ .

Exchange between two conformers

NOESY1D (b-c)

-25°C

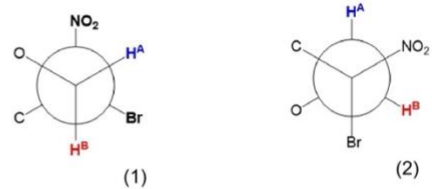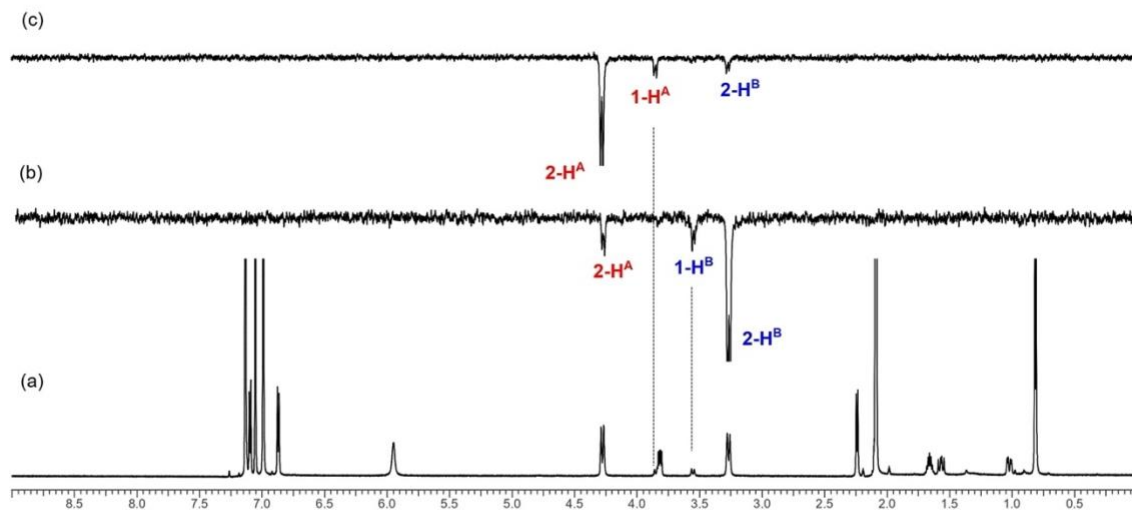

Figure S22. NOESY 1D  $^1\text{H}$  NMR Spectrum of **1c** in toluene- $d_8$ .

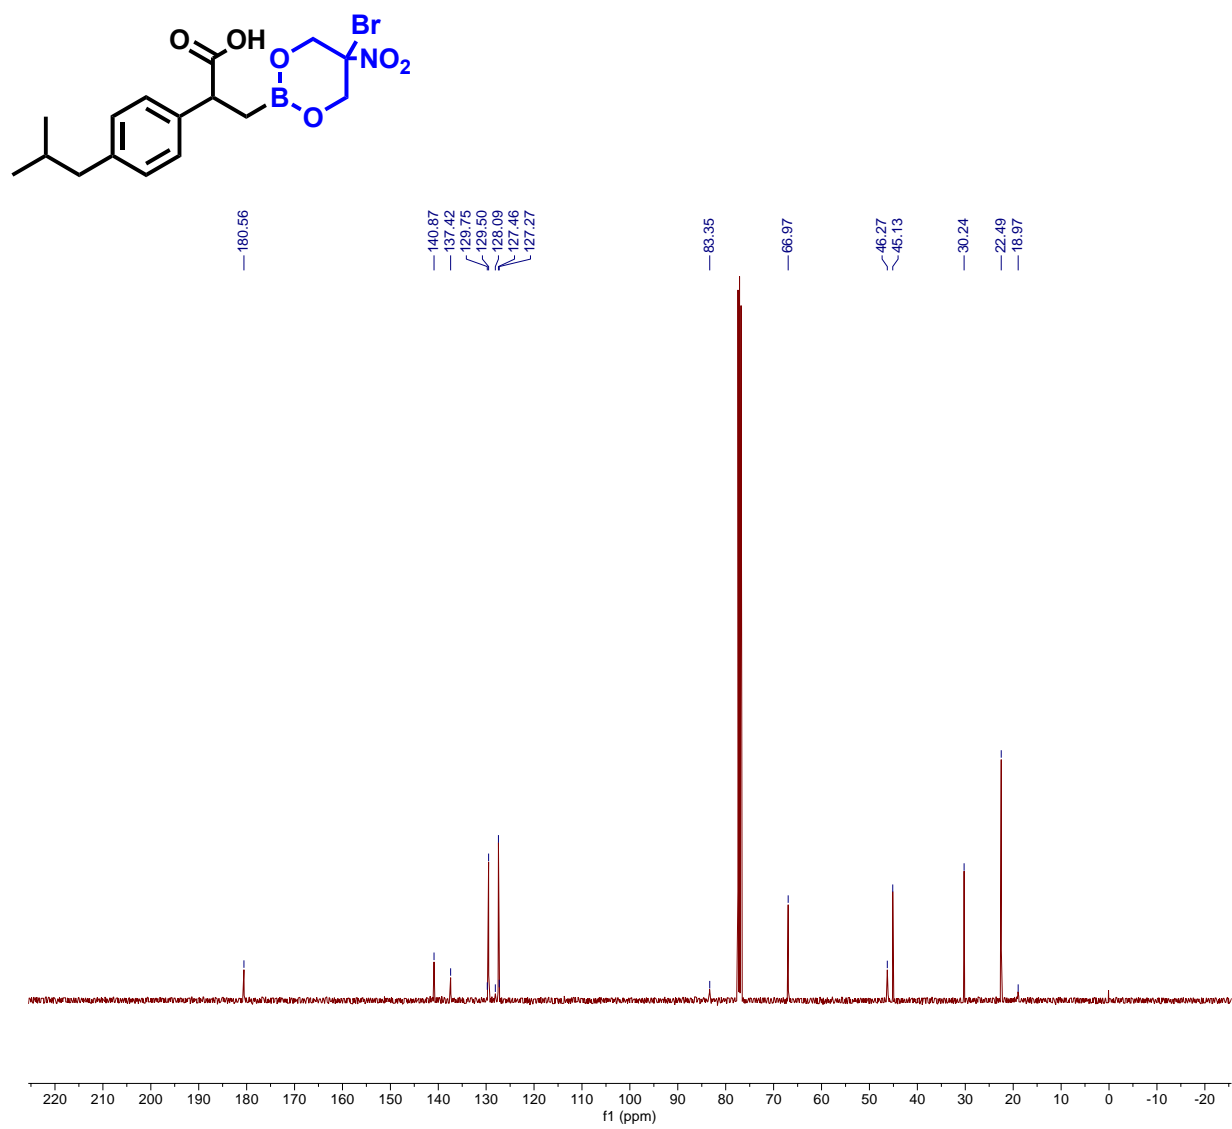

Figure S23.  $^{13}\text{C}$  NMR Spectrum of **1c** in CDCl<sub>3</sub>.

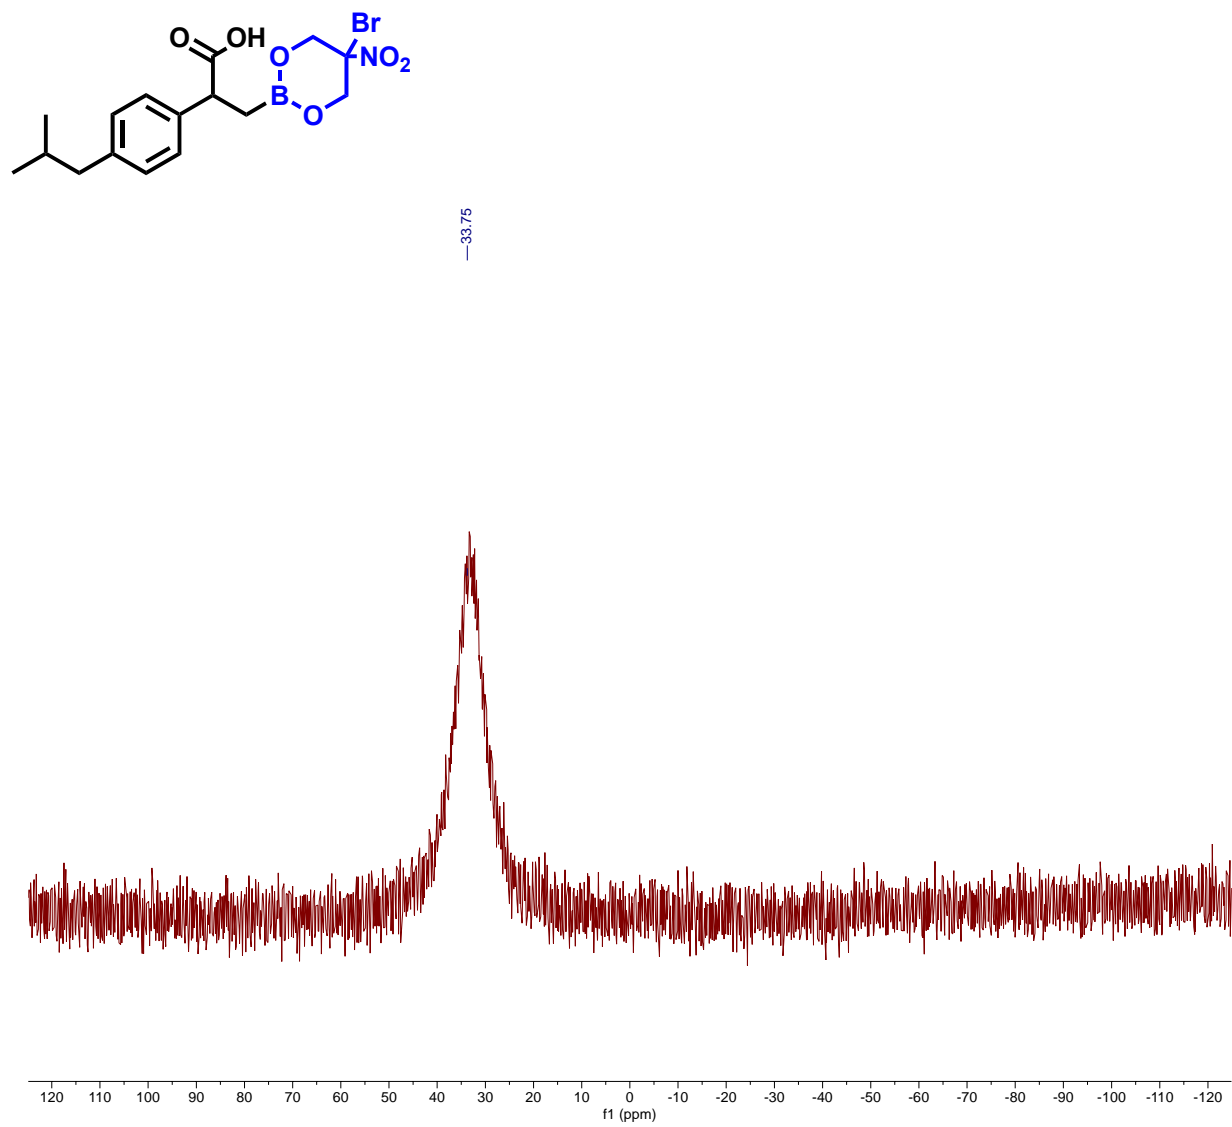

Figure S24.  $^{11}\text{B}$  NMR Spectrum of **1c** in  $\text{CDCl}_3$ .

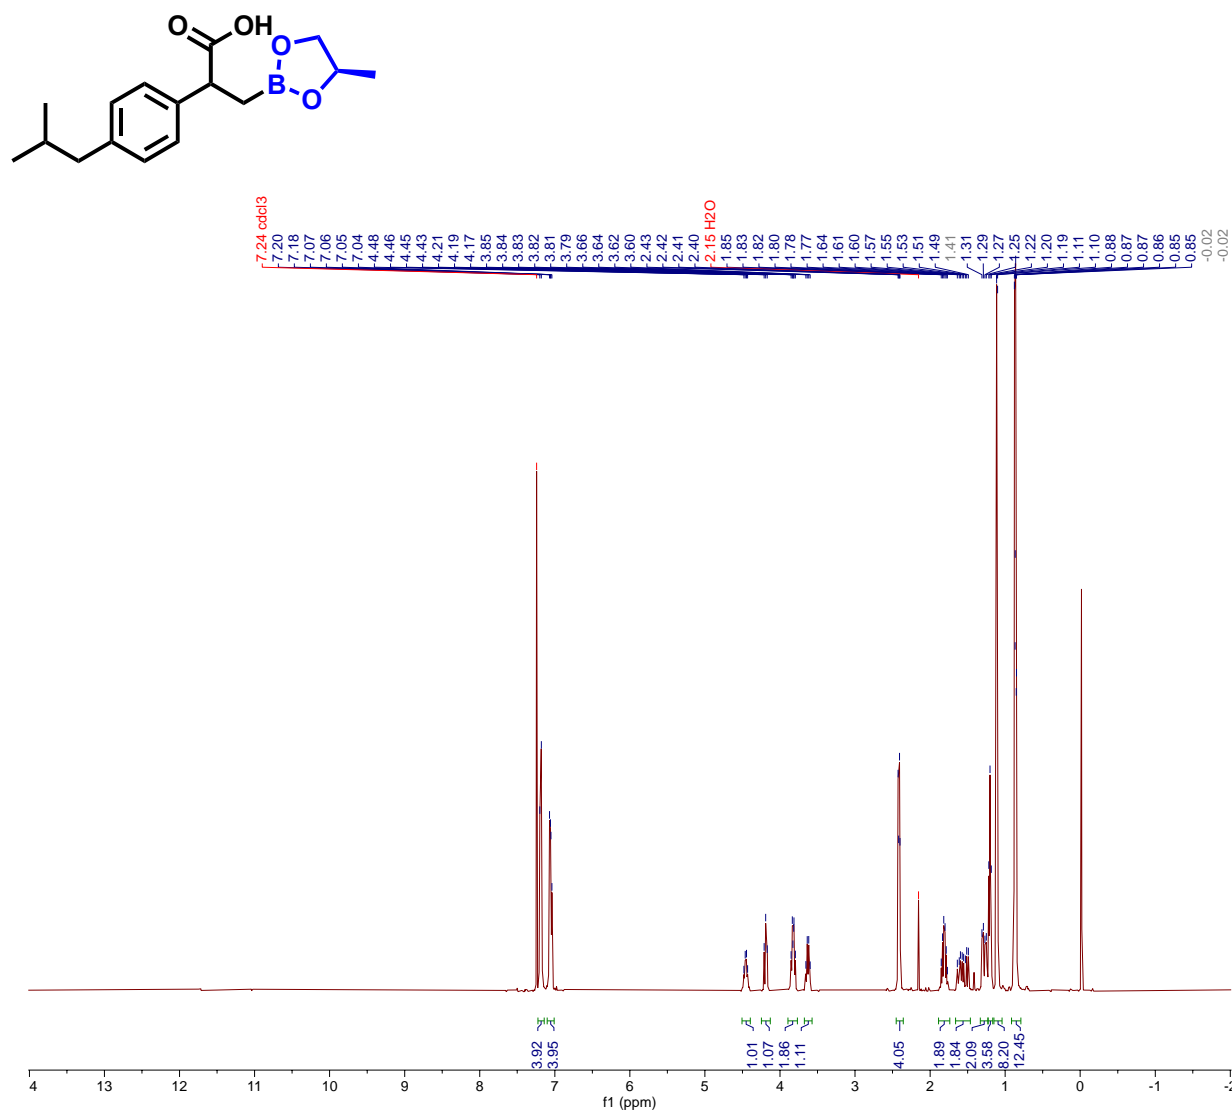

Figure S25. <sup>1</sup>H NMR Spectrum of **1f** in CDCl<sub>3</sub>.



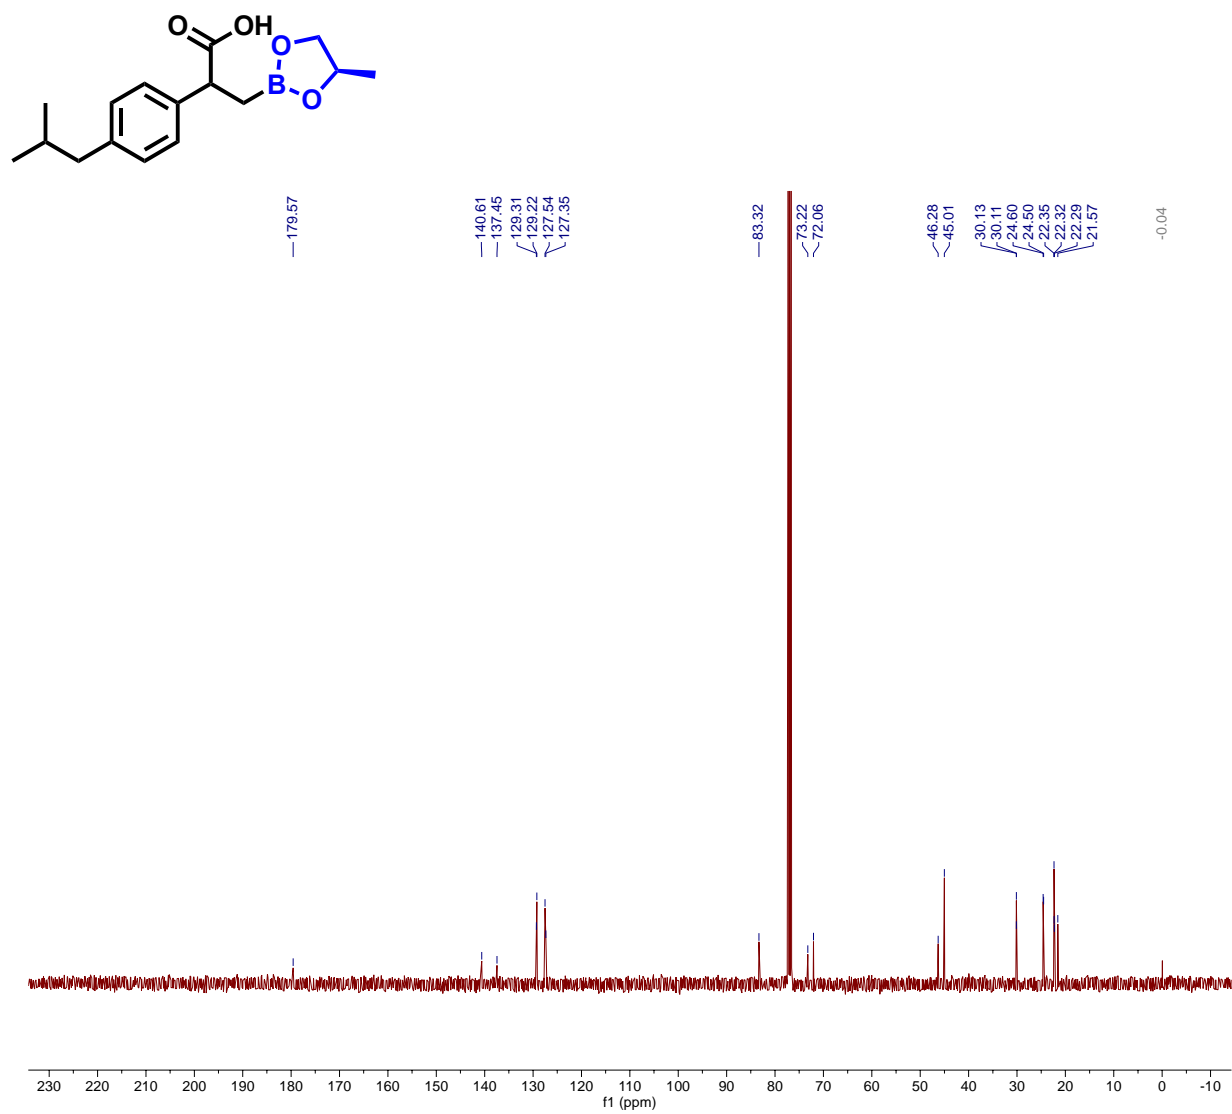

Figure S26.  $^{13}\text{C}$  NMR Spectrum of **1f** in CDCl<sub>3</sub>.

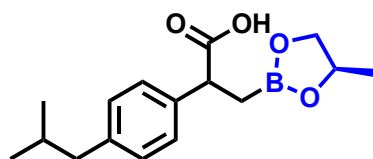

—34.57

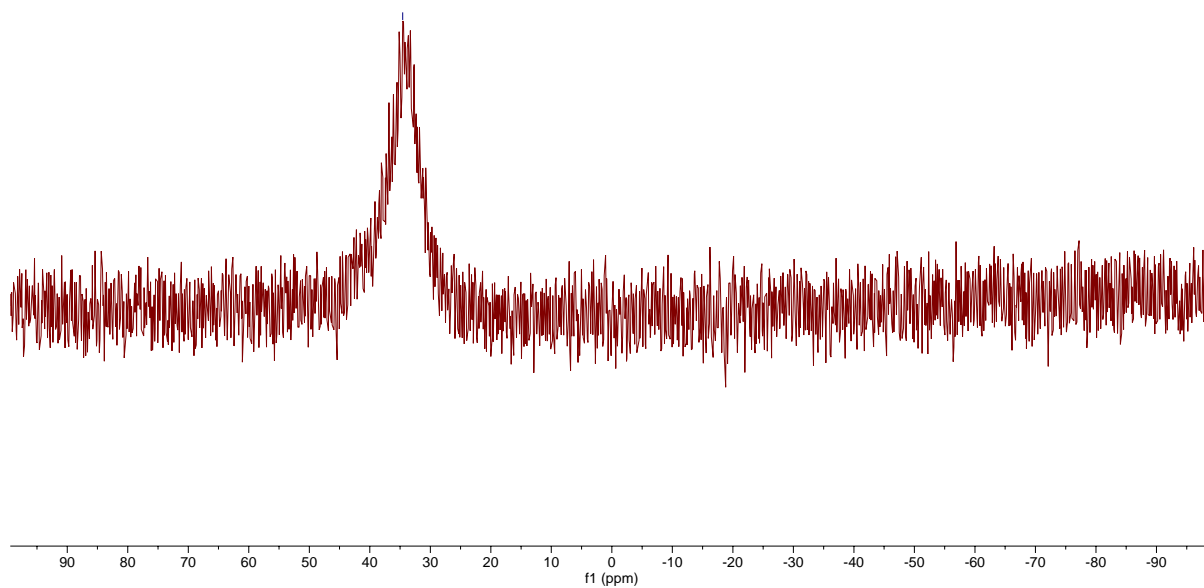

Figure S27.  $^{11}\text{B}$  NMR Spectrum of **1f** in  $\text{CDCl}_3$ .

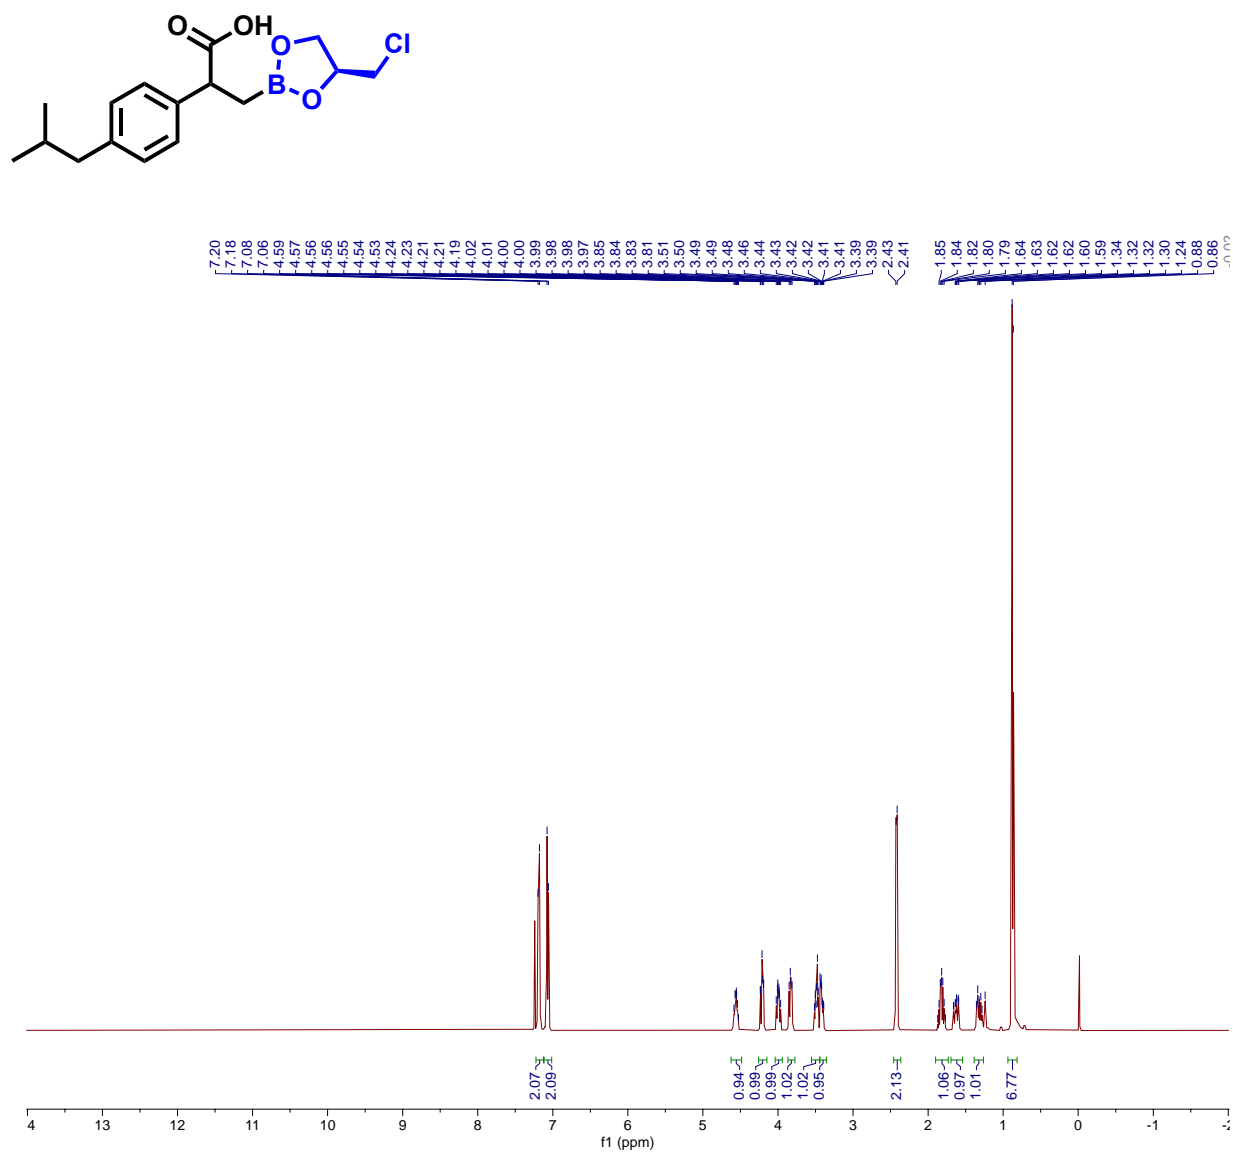

Figure S28. <sup>1</sup>H NMR Spectrum of **1g** in CDCl<sub>3</sub>.

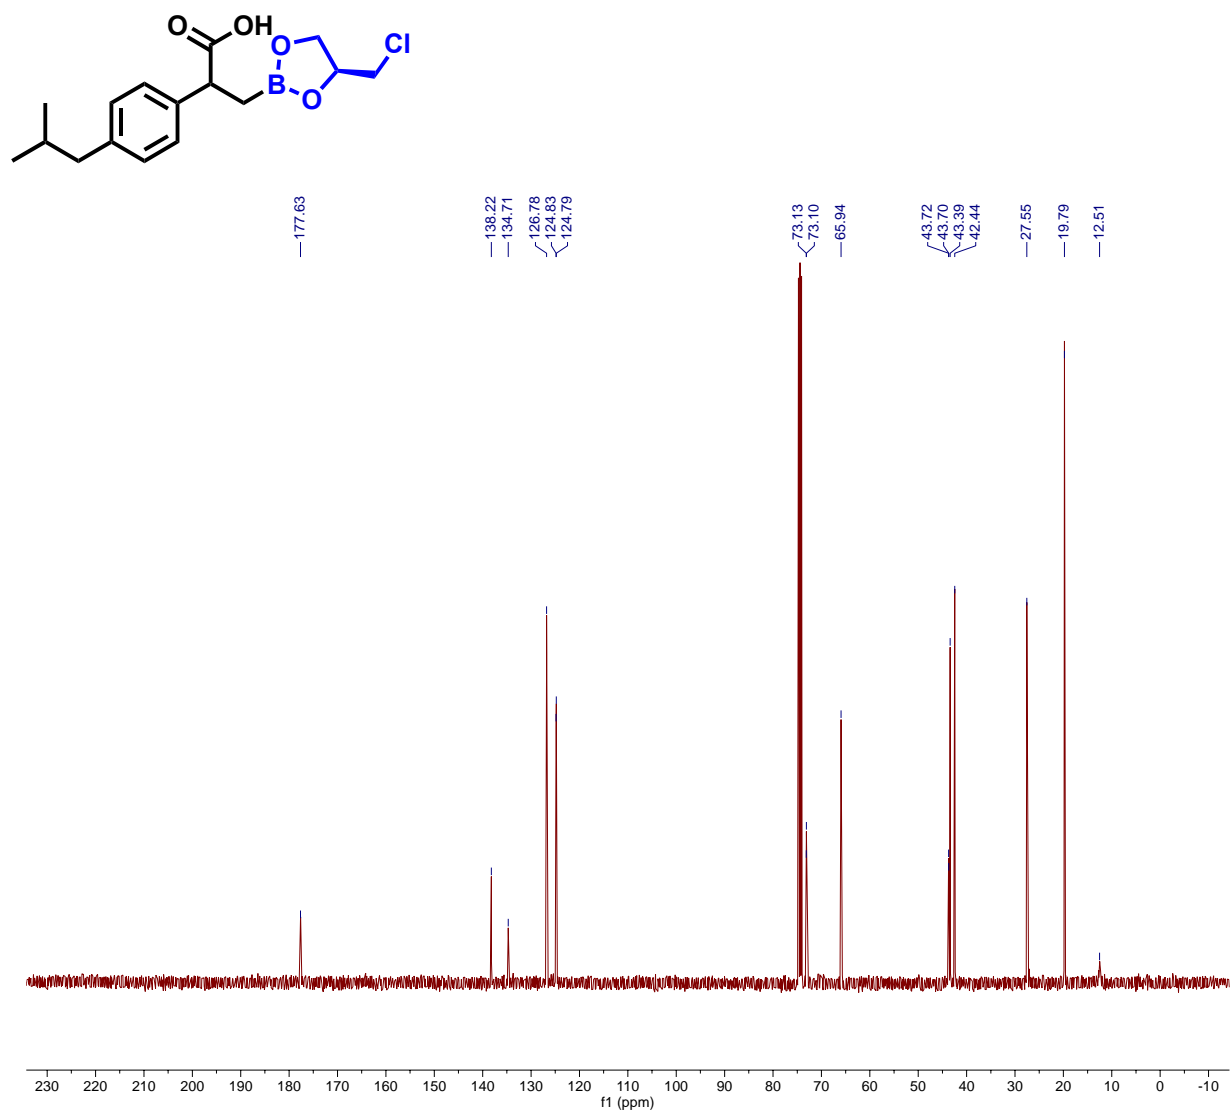

Figure S29.  $^{13}\text{C}$  NMR Spectrum of **1g** in CDCl<sub>3</sub>.

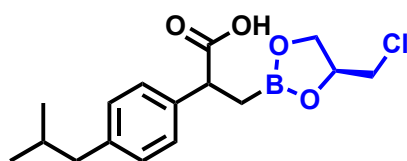

—32.69

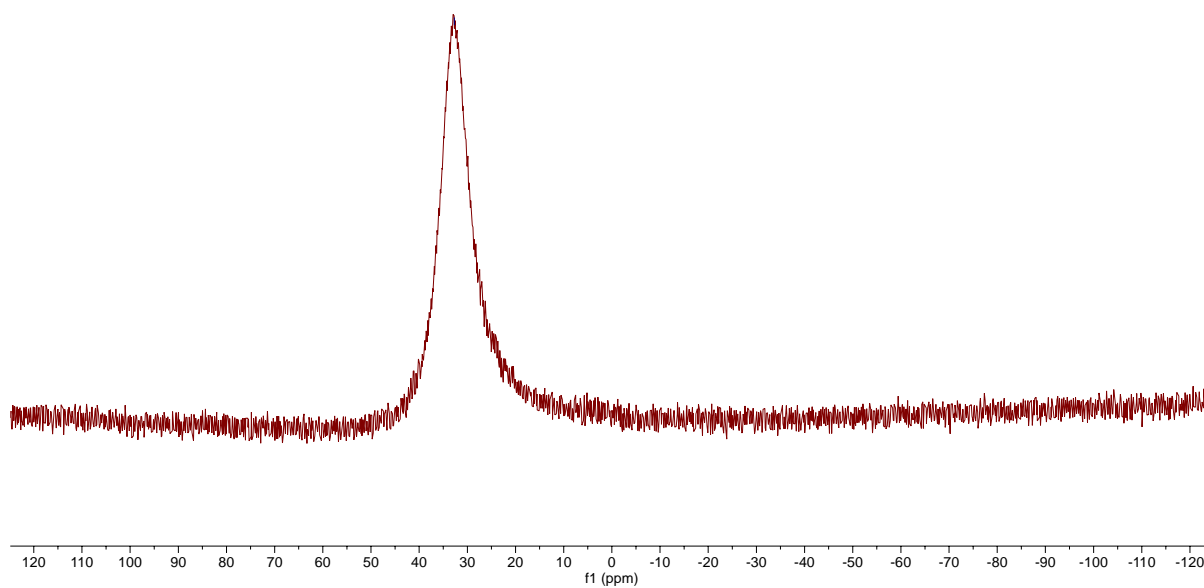

Figure S30.  $^{11}\text{B}$  NMR Spectrum of **1g** in  $\text{CDCl}_3$ .

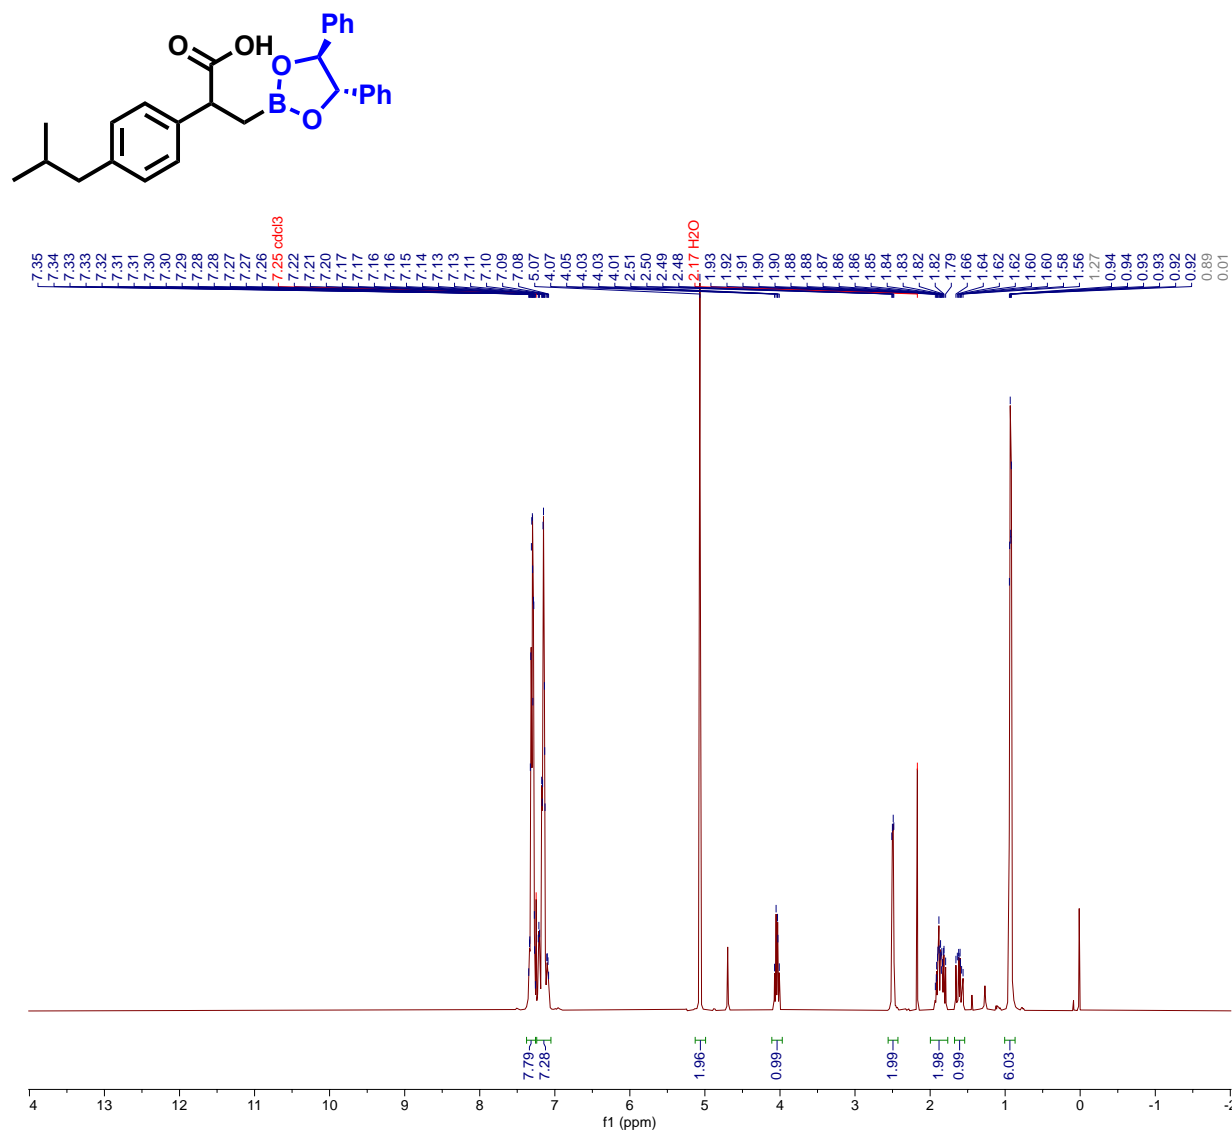

Figure S31. <sup>1</sup>H NMR Spectrum of **1h** in CDCl<sub>3</sub>.

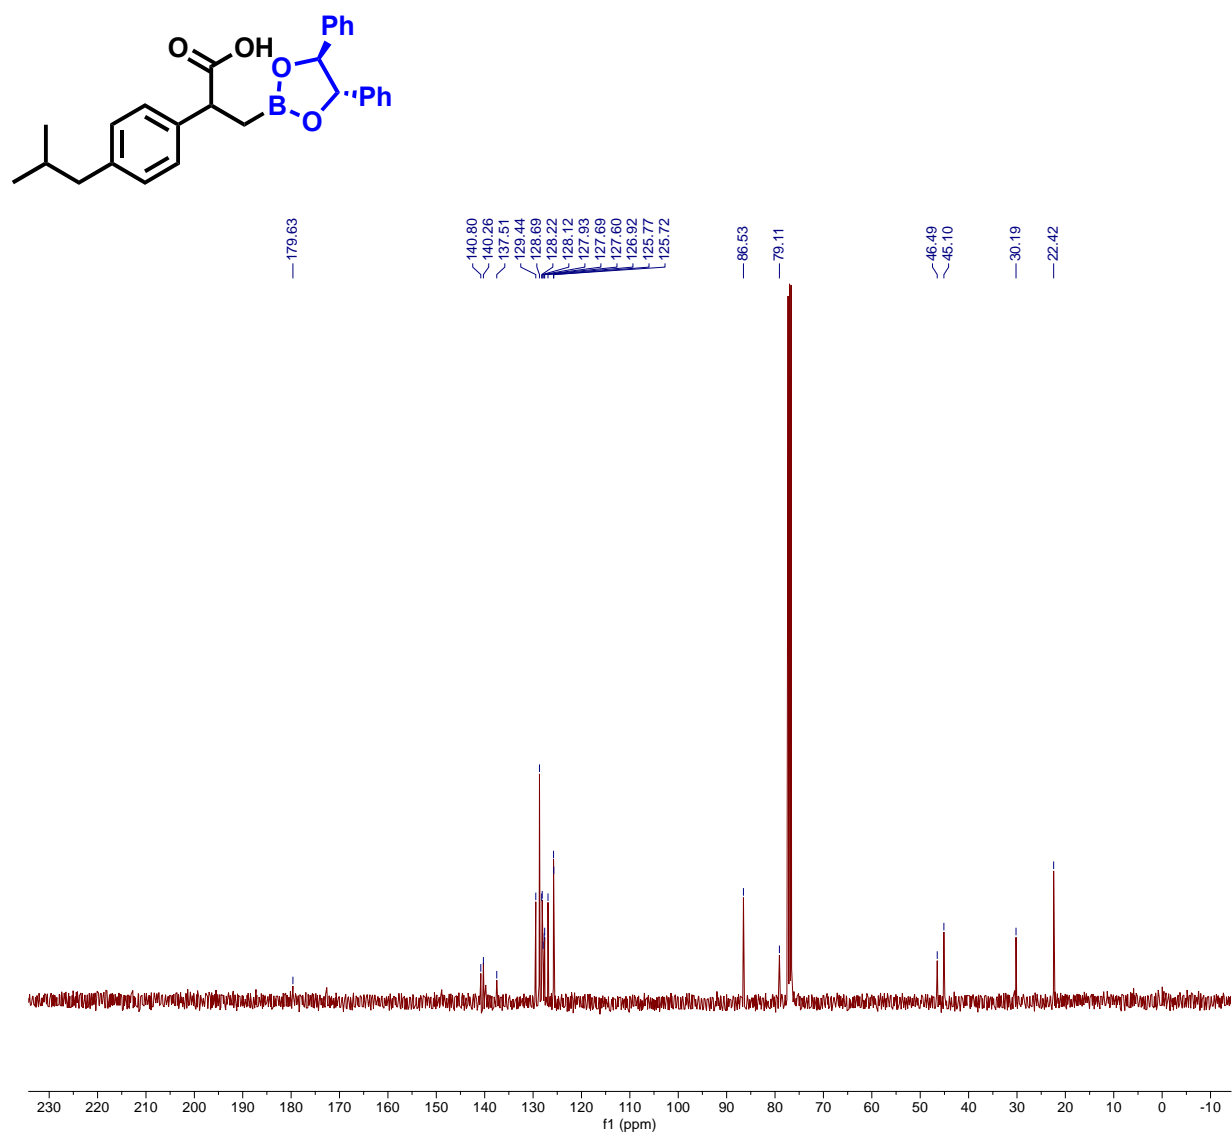

Figure S32. <sup>13</sup>C NMR Spectrum of **1h** in CDCl<sub>3</sub>.

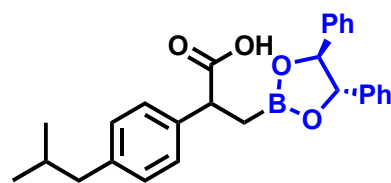

—33.67

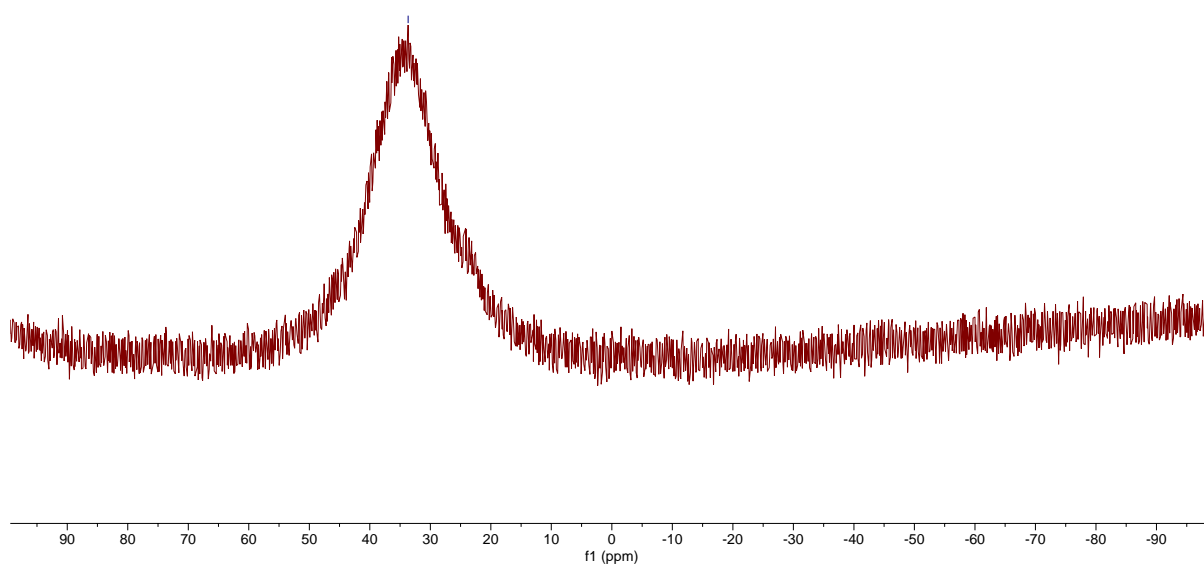

Figure S33.  $^{11}\text{B}$  NMR Spectrum of **1h** in  $\text{CDCl}_3$ .



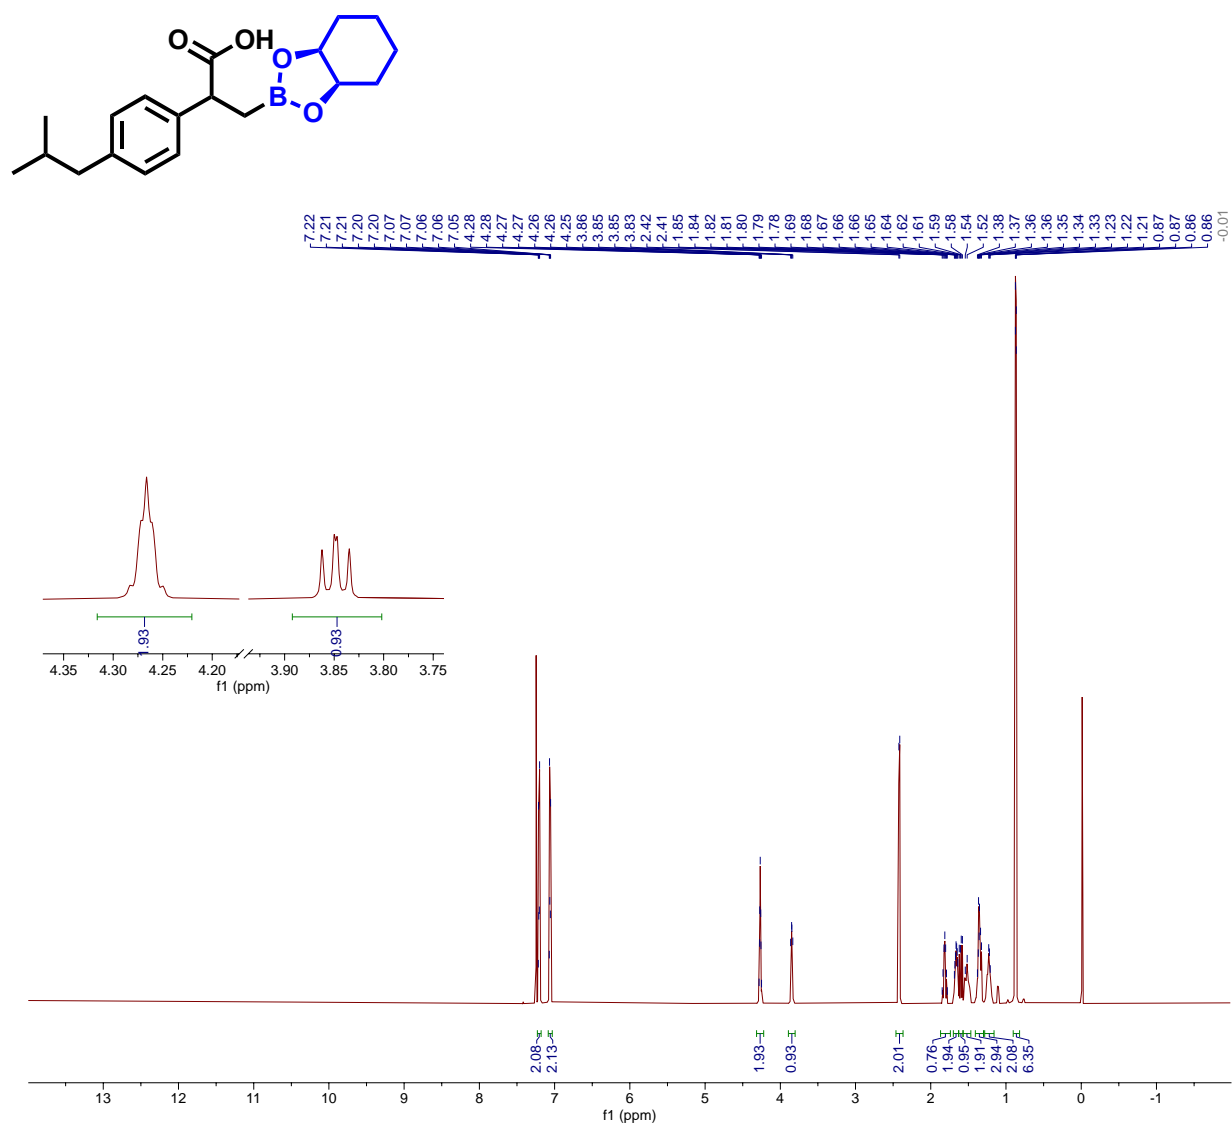

Figure S34. a) <sup>1</sup>H NMR Spectrum of **1i** in CDCl<sub>3</sub>.

A series of selective decoupled  
 $^1\text{H}$  NMR spectra (b-d)

Simultaneously irradiation of two different  
 frequencies---c and d subspectra

400 MHz JEOL NMR

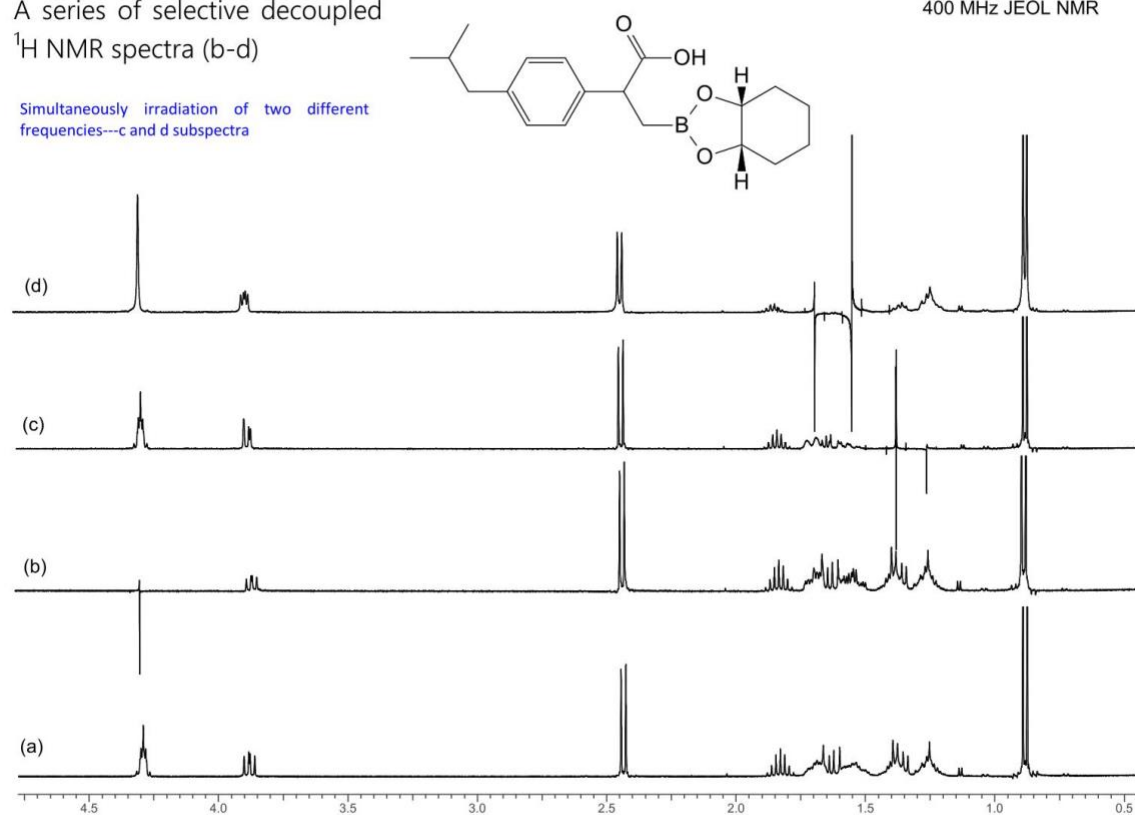

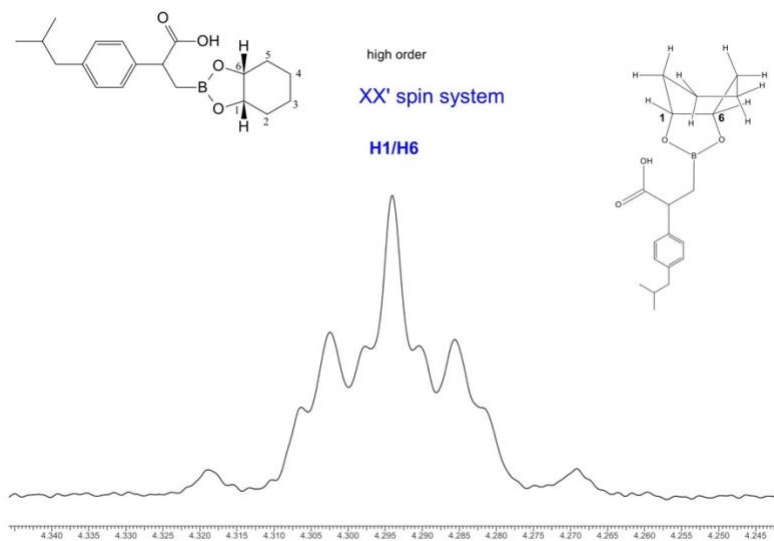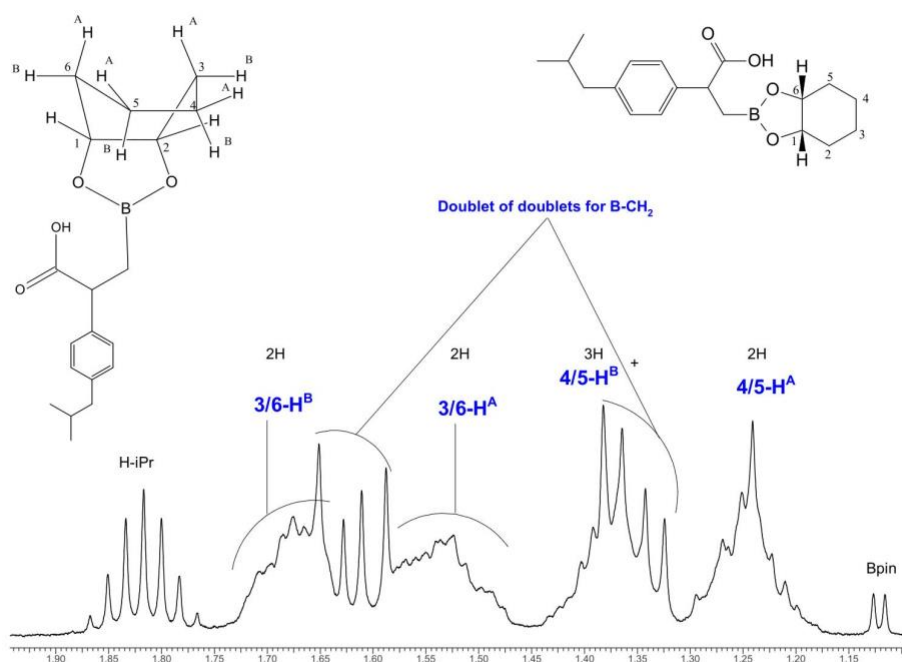

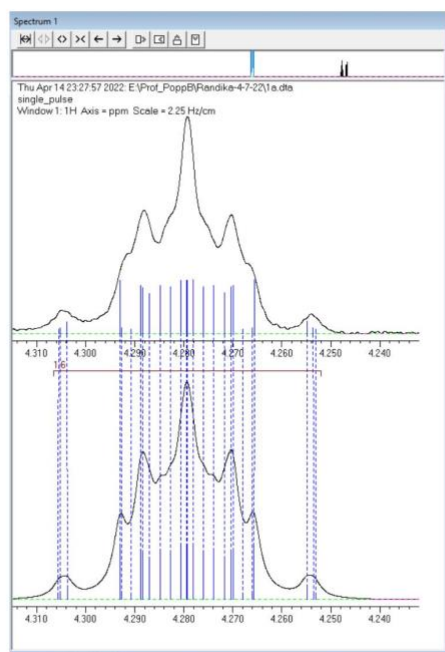

Simulation of the multiplicity patterns of OCH protons (bridge)

Coupling constants in Hz

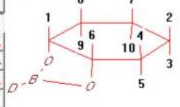

| #  | n | Shift | Width | J[1] | J[2]   | J[3] | J[4]   | J[5] | J[6] | J[7]   | J[8]   | J[9] |
|----|---|-------|-------|------|--------|------|--------|------|------|--------|--------|------|
| 1  | 1 | 4.279 |       |      |        |      |        |      |      |        |        |      |
|    | x | -     |       |      |        |      |        |      |      |        |        |      |
| 2  | f | 1.360 |       | 0.00 |        |      |        |      |      |        |        |      |
|    | c | -     |       |      |        |      |        |      |      |        |        |      |
| 3  | f | 1.230 |       | 0.00 | -12.00 |      |        |      |      |        |        |      |
|    | d | -     |       |      |        |      |        |      |      |        |        |      |
| 4  | 1 | 1.539 |       | 0.00 | 7.00   | 7.00 |        |      |      |        |        |      |
|    | a | -     |       |      |        |      |        |      |      |        |        |      |
| 5  | 1 | 1.679 |       | 0.00 | 7.00   | 7.00 | -13.60 |      |      |        |        |      |
|    | b | -     |       |      |        |      | ab     |      |      |        |        |      |
| 6  | 1 | 4.279 |       | 6.70 | 0.00   | 0.00 | 4.97   | 5.98 |      |        |        |      |
|    | x | -     | xx'   |      |        |      | ax     | bx   |      |        |        |      |
| 7  | f | 1.360 |       | 0.00 | 7.00   | 7.00 | 0.00   | 0.00 | 0.00 |        |        |      |
|    | c | -     |       |      |        |      |        |      |      |        |        |      |
| 8  | 1 | 1.539 |       | 4.97 | 0.00   | 0.00 | 0.00   | 0.00 | 0.00 | 7.00   |        |      |
|    | a | -     |       | ax   |        |      |        |      |      |        |        |      |
| 9  | 1 | 1.679 |       | 5.98 | 0.00   | 0.00 | 0.00   | 0.00 | 0.00 | 7.00   | -13.60 |      |
|    | b | -     |       | bx   |        |      |        |      |      |        | ab     |      |
| 10 | f | 1.230 |       | 0.00 | 7.00   | 7.00 | 0.00   | 0.00 | 0.00 | -16.00 | 7.00   | 7.00 |
|    | d | -     |       |      |        |      |        |      |      |        |        |      |

Figure S34. b) Additional  $^1\text{H}$  NMR characterization data for **1i** in  $\text{CDCl}_3$ .

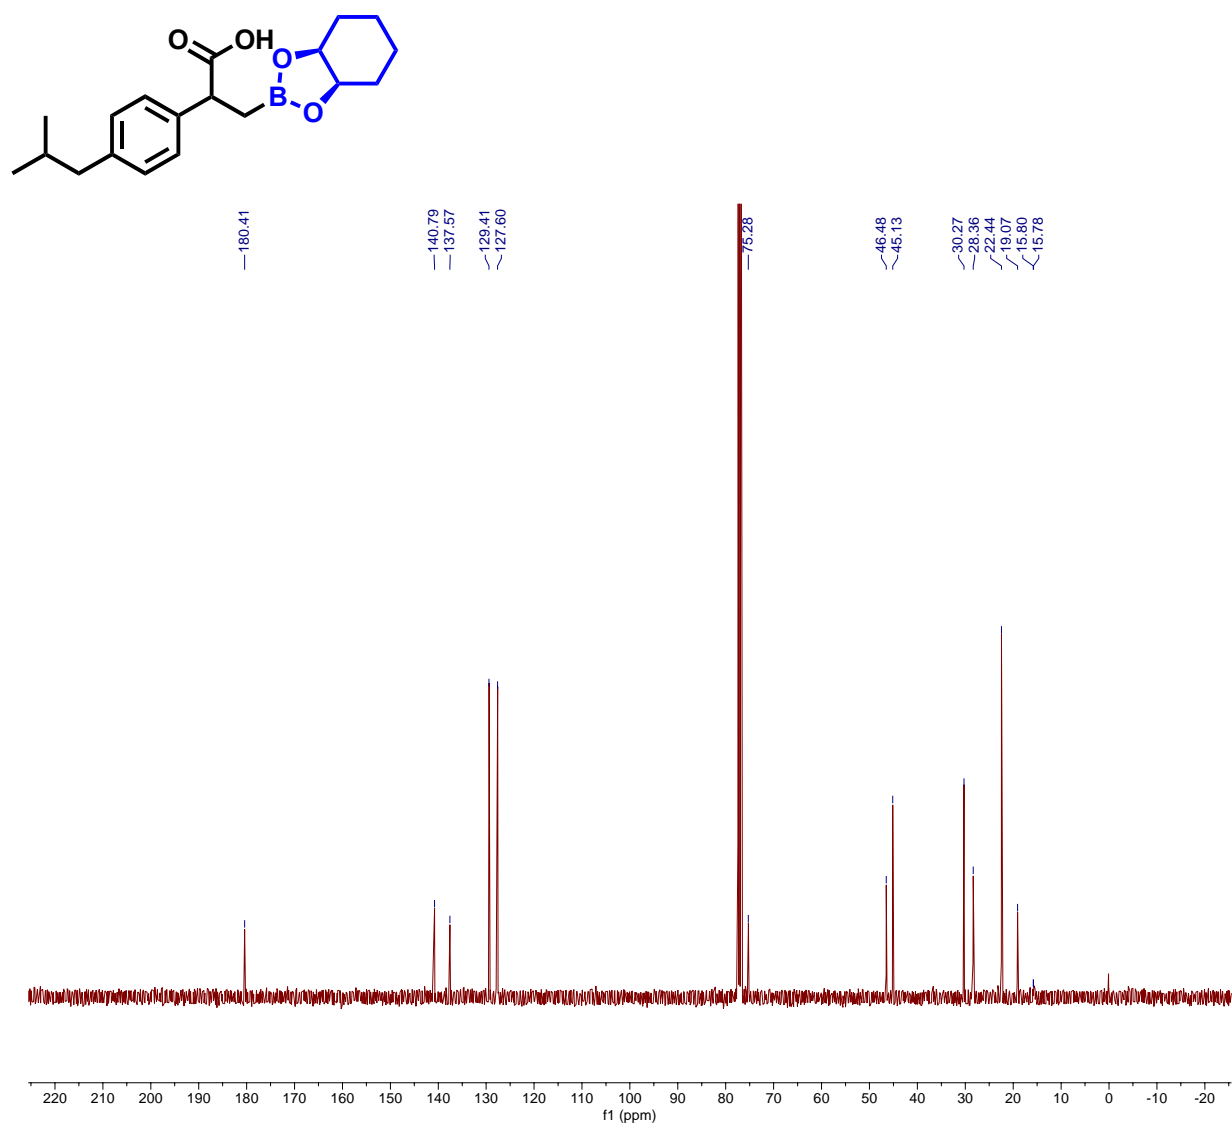

Figure S35.  $^{13}\text{C}$  NMR Spectrum of **1i** in CDCl<sub>3</sub>.

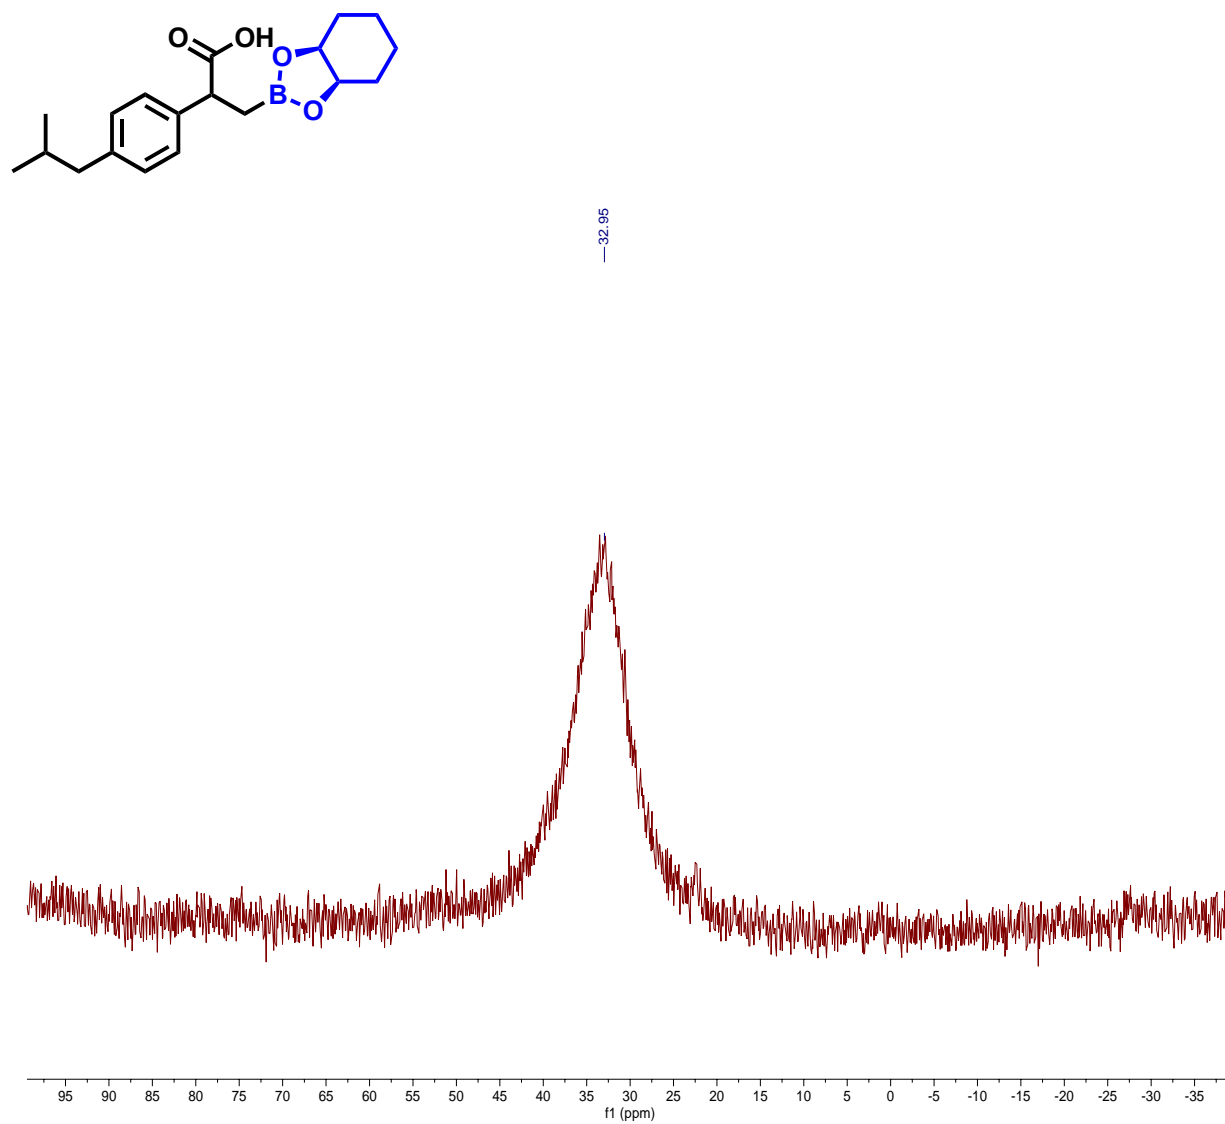

Figure S36.  $^{11}\text{B}$  NMR Spectrum of **1i** in  $\text{CDCl}_3$ .

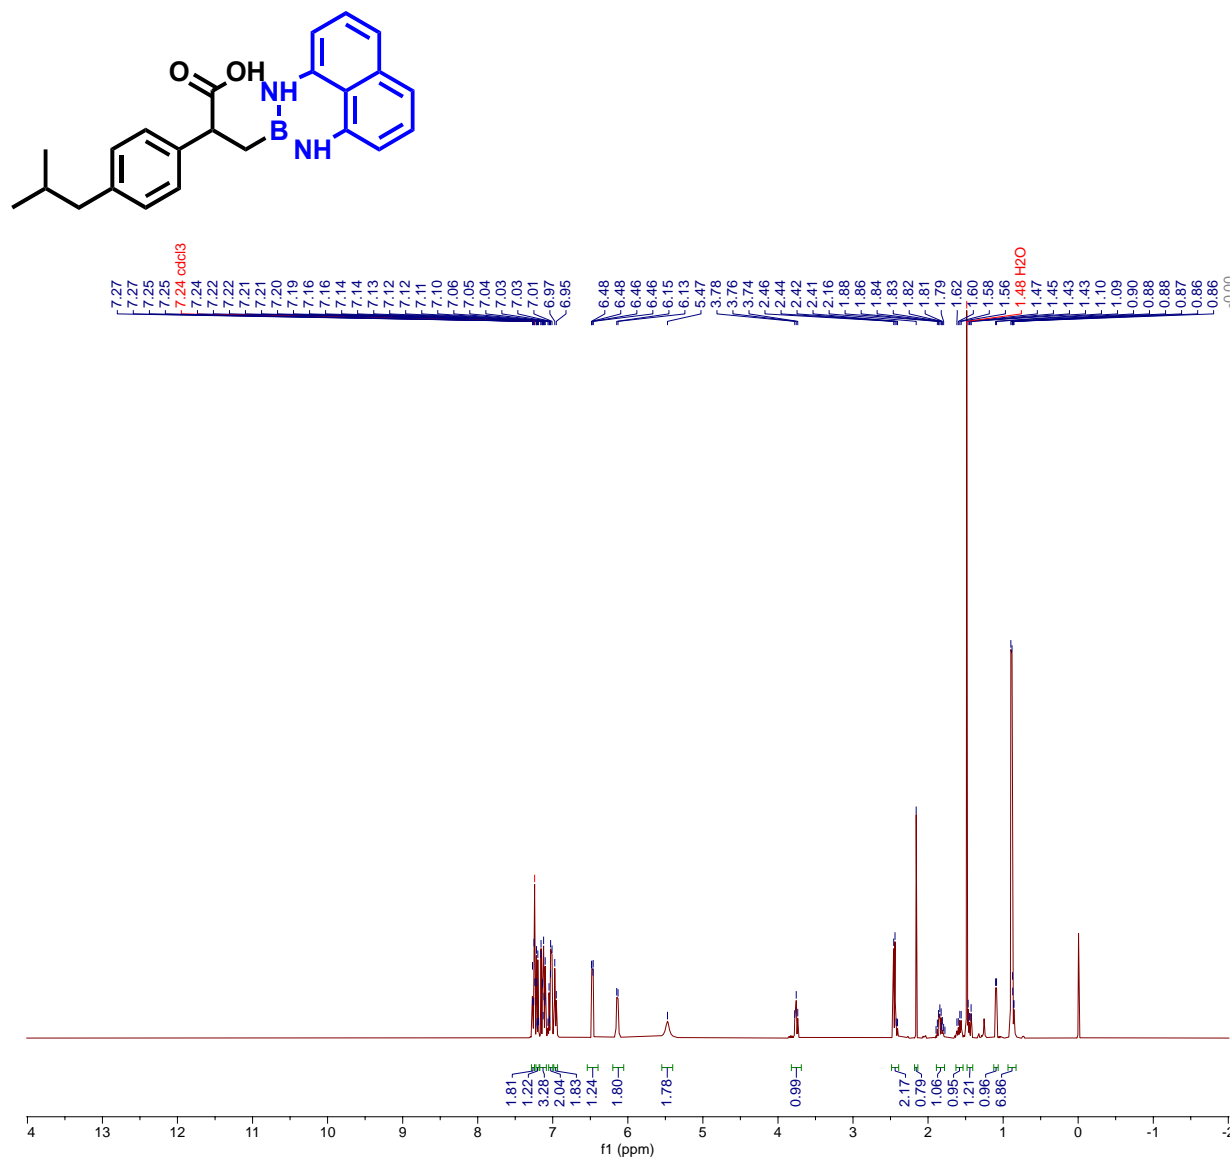

Figure S37. <sup>1</sup>H NMR Spectrum of **1j** in CDCl<sub>3</sub>.

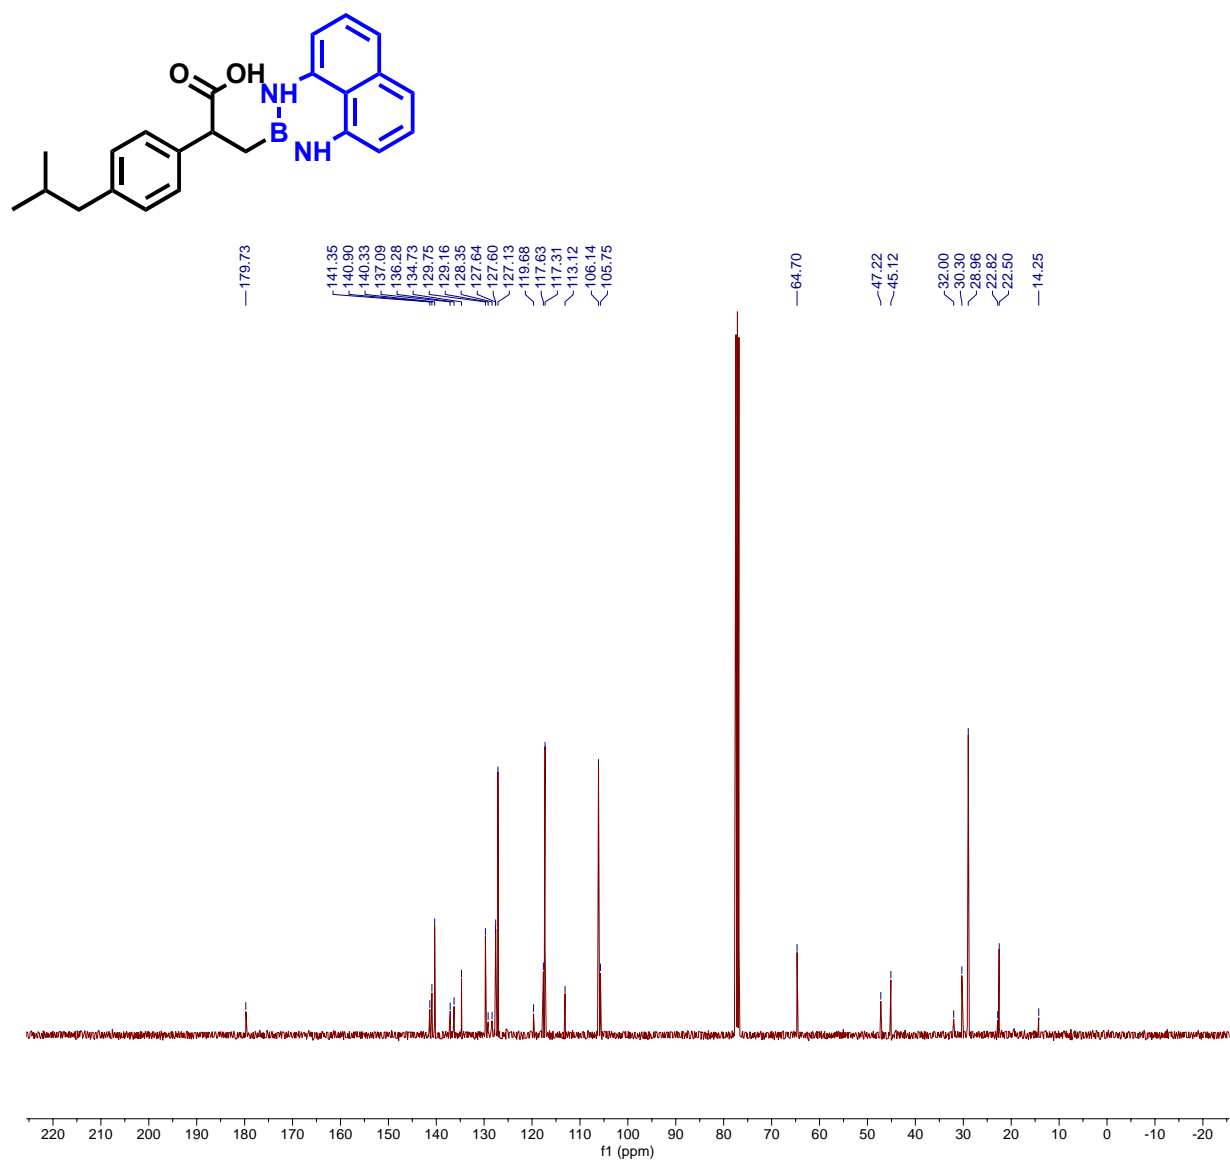

Figure S38.  $^{13}\text{C}$  NMR Spectrum of **1j** in CDCl<sub>3</sub>.



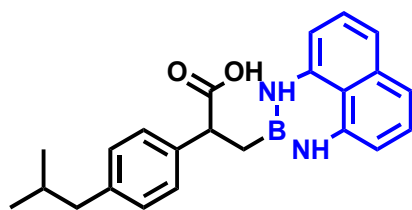

— 31.62

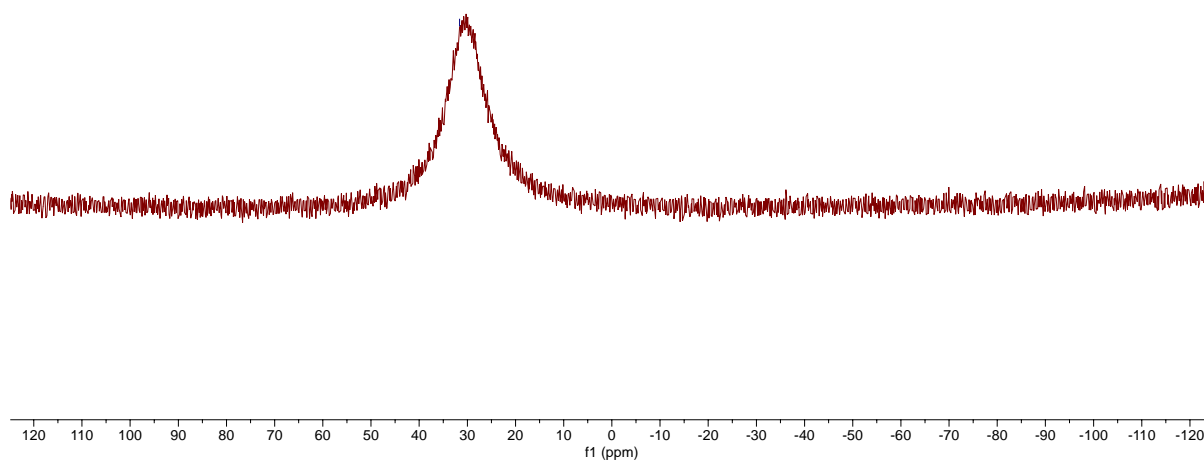

Figure S39.  $^{13}\text{C}$  NMR Spectrum of **1j** in  $\text{CDCl}_3$ .

**Table S1. Crystal data and structure refinement for 1e (CCDC ID: 2225404).**

|                                             |                                                               |
|---------------------------------------------|---------------------------------------------------------------|
| Identification code                         | <b>1e</b>                                                     |
| Empirical formula                           | C <sub>16</sub> H <sub>21</sub> BBrNO <sub>6</sub>            |
| Formula weight                              | 414.06                                                        |
| Temperature/K                               | 100.0                                                         |
| Crystal system                              | monoclinic                                                    |
| Space group                                 | P2 <sub>1</sub> /c                                            |
| a/Å                                         | 15.0011(5)                                                    |
| b/Å                                         | 13.4984(5)                                                    |
| c/Å                                         | 9.1329(3)                                                     |
| α/°                                         | 90                                                            |
| β/°                                         | 102.251(2)                                                    |
| γ/°                                         | 90                                                            |
| Volume/Å <sup>3</sup>                       | 1807.21(11)                                                   |
| Z                                           | 4                                                             |
| ρ <sub>calc</sub> /cm <sup>3</sup>          | 1.522                                                         |
| μ/mm <sup>-1</sup>                          | 2.306                                                         |
| F(000)                                      | 848.0                                                         |
| Crystal size/mm <sup>3</sup>                | 0.3 × 0.2 × 0.1                                               |
| Radiation                                   | MoKα (λ = 0.71073)                                            |
| 2θ range for data collection/°              | 5.472 to 51.462                                               |
| Index ranges                                | -18 ≤ h ≤ 18, -16 ≤ k ≤ 16, -11 ≤ l ≤ 11                      |
| Reflections collected                       | 55837                                                         |
| Independent reflections                     | 3448 [R <sub>int</sub> = 0.0922, R <sub>sigma</sub> = 0.0320] |
| Data/restraints/parameters                  | 3448/348/285                                                  |
| Goodness-of-fit on F <sup>2</sup>           | 1.167                                                         |
| Final R indexes [I ≥ 2σ (I)]                | R <sub>1</sub> = 0.0663, wR <sub>2</sub> = 0.1408             |
| Final R indexes [all data]                  | R <sub>1</sub> = 0.0814, wR <sub>2</sub> = 0.1472             |
| Largest diff. peak/hole / e Å <sup>-3</sup> | 0.75/-0.73                                                    |
